# Supplementary material
Source: Research Square preprint supplement (doi:10.21203/rs.3.rs-9039006/v1)
Supplement: Supplementary file 1 [file 374d126d77bd5d90d6333a7e.docx]

Supplementary Table S1. Longitudinal changes in vessel volume density (VVD) relative to baseline (Holm-adjusted).

| **Group** | **Layer** | **Region** | **Time** | **β** | **SE** | **CI_low** | **CI_high** | **p value** |
| --- | --- | --- | --- | --- | --- | --- | --- | --- |
| Supranormal dose | DCP | F | post-op 1d | 0.006907115 | 0.00391 | -0.00076 | 0.01457 | 0.231823 |
|  | DCP | F | post-op 2w | 0.001937697 | 0.002192 | -0.00236 | 0.006234 | 0.376761 |
|  | DCP | F | post-op 6w | 0.004354363 | 0.002879 | -0.00129 | 0.009997 | 0.260854 |
|  | ICP | F | post-op 1d | 0.00713757 | 0.004451 | -0.00159 | 0.015861 | 0.326319 |
|  | ICP | F | post-op 2w | 0.011797759 | 0.007527 | -0.00296 | 0.026551 | 0.326319 |
|  | ICP | F | post-op 6w | 0.004769483 | 0.004903 | -0.00484 | 0.014379 | 0.33064 |
|  | SVP | F | post-op 1d | 0.011956533 | 0.005696 | 0.000792 | 0.023121 | 0.107445 |
|  | SVP | F | post-op 2w | 0.013465272 | 0.007007 | -0.00027 | 0.027198 | 0.109277 |
|  | SVP | F | post-op 6w | 0.009854277 | 0.007591 | -0.00502 | 0.024733 | 0.194257 |
|  | DCP | II | post-op 1d | -0.007592988 | 0.008777 | -0.0248 | 0.009609 | 0.941772 |
|  | DCP | II | post-op 2w | 0.00855003 | 0.00849 | -0.00809 | 0.025191 | 0.941772 |
|  | DCP | II | post-op 6w | -0.007777616 | 0.008709 | -0.02485 | 0.009291 | 0.941772 |
|  | ICP | II | post-op 1d | -0.009229653 | 0.007789 | -0.0245 | 0.006037 | 0.440489 |
|  | ICP | II | post-op 2w | 0.02083315 | 0.009263 | 0.002679 | 0.038988 | 0.073507 |
|  | ICP | II | post-op 6w | -0.008740854 | 0.00713 | -0.02272 | 0.005234 | 0.440489 |
|  | SVP | II | post-op 1d | 0.001152567 | 0.010979 | -0.02037 | 0.022672 | 1 |
|  | SVP | II | post-op 2w | 0.024731762 | 0.010493 | 0.004166 | 0.045298 | 0.055275 |
|  | SVP | II | post-op 6w | 0.002255112 | 0.010165 | -0.01767 | 0.022179 | 1 |
|  | DCP | IN | post-op 1d | -0.007036125 | 0.008064 | -0.02284 | 0.00877 | 0.765885 |
|  | DCP | IN | post-op 2w | 0.010712428 | 0.007764 | -0.0045 | 0.02593 | 0.50299 |
|  | DCP | IN | post-op 6w | -0.003846392 | 0.007426 | -0.0184 | 0.010708 | 0.765885 |
|  | ICP | IN | post-op 1d | -0.000661188 | 0.009096 | -0.01849 | 0.017166 | 1 |
|  | ICP | IN | post-op 2w | 0.036574168 | 0.010887 | 0.015235 | 0.057913 | 0.002344 |
|  | ICP | IN | post-op 6w | 0.002269759 | 0.008633 | -0.01465 | 0.01919 | 1 |
|  | SVP | IN | post-op 1d | -0.004126942 | 0.009426 | -0.0226 | 0.014349 | 1 |
|  | SVP | IN | post-op 2w | 0.021969655 | 0.008828 | 0.004666 | 0.039273 | 0.038482 |
|  | SVP | IN | post-op 6w | 0.002301312 | 0.00901 | -0.01536 | 0.019961 | 1 |
|  | DCP | IS | post-op 1d | -0.003064977 | 0.008807 | -0.02033 | 0.014196 | 1 |
|  | DCP | IS | post-op 2w | 0.012586954 | 0.008127 | -0.00334 | 0.028515 | 0.364265 |
|  | DCP | IS | post-op 6w | -0.000503763 | 0.008356 | -0.01688 | 0.015874 | 1 |
|  | ICP | IS | post-op 1d | -0.008044949 | 0.008289 | -0.02429 | 0.008201 | 0.663537 |
|  | ICP | IS | post-op 2w | 0.022999416 | 0.008836 | 0.005681 | 0.040318 | 0.027738 |
|  | ICP | IS | post-op 6w | -0.003597585 | 0.007091 | -0.0175 | 0.010301 | 0.663537 |
|  | SVP | IS | post-op 1d | 0.009583218 | 0.00987 | -0.00976 | 0.028929 | 0.6632 |
|  | SVP | IS | post-op 2w | 0.026478608 | 0.009147 | 0.008551 | 0.044406 | 0.011381 |
|  | SVP | IS | post-op 6w | 0.001437449 | 0.009242 | -0.01668 | 0.019551 | 0.876398 |
|  | DCP | IT | post-op 1d | -0.008872243 | 0.007673 | -0.02391 | 0.006167 | 0.742746 |
|  | DCP | IT | post-op 2w | 0.010033389 | 0.009774 | -0.00912 | 0.02919 | 0.742746 |
|  | DCP | IT | post-op 6w | -0.007685765 | 0.009491 | -0.02629 | 0.010916 | 0.742746 |
|  | ICP | IT | post-op 1d | -0.013862262 | 0.009307 | -0.0321 | 0.004379 | 0.331313 |
|  | ICP | IT | post-op 2w | 0.015593248 | 0.009769 | -0.00355 | 0.03474 | 0.331313 |
|  | ICP | IT | post-op 6w | -0.00916187 | 0.00848 | -0.02578 | 0.007458 | 0.331313 |
|  | SVP | IT | post-op 1d | 0.004306893 | 0.009629 | -0.01456 | 0.023178 | 1 |
|  | SVP | IT | post-op 2w | 0.018779615 | 0.009394 | 0.000368 | 0.037192 | 0.136794 |
|  | SVP | IT | post-op 6w | -0.00101121 | 0.009017 | -0.01868 | 0.016662 | 1 |
|  | DCP | OI | post-op 1d | -0.027439908 | 0.013132 | -0.05318 | -0.0017 | 0.109959 |
|  | DCP | OI | post-op 2w | -0.005875244 | 0.014625 | -0.03454 | 0.022789 | 0.687888 |
|  | DCP | OI | post-op 6w | -0.025464126 | 0.012424 | -0.04981 | -0.00111 | 0.109959 |
|  | ICP | OI | post-op 1d | -0.037804266 | 0.035359 | -0.10711 | 0.031499 | 0.855007 |
|  | ICP | OI | post-op 2w | -0.016876346 | 0.035876 | -0.08719 | 0.05344 | 0.855007 |
|  | ICP | OI | post-op 6w | -0.030575934 | 0.037295 | -0.10367 | 0.042521 | 0.855007 |
|  | SVP | OI | post-op 1d | -0.005704038 | 0.011538 | -0.02832 | 0.01691 | 1 |
|  | SVP | OI | post-op 2w | 0.011153169 | 0.010444 | -0.00932 | 0.031623 | 0.856719 |
|  | SVP | OI | post-op 6w | -0.005844794 | 0.011938 | -0.02924 | 0.017553 | 1 |
|  | DCP | ON | post-op 1d | -0.021647901 | 0.009141 | -0.03956 | -0.00373 | 0.053634 |
|  | DCP | ON | post-op 2w | 0.005998373 | 0.008953 | -0.01155 | 0.023546 | 0.502858 |
|  | DCP | ON | post-op 6w | -0.014438119 | 0.007821 | -0.02977 | 0.00089 | 0.129741 |
|  | ICP | ON | post-op 1d | -0.007346147 | 0.009425 | -0.02582 | 0.011126 | 0.708905 |
|  | ICP | ON | post-op 2w | 0.035054646 | 0.00911 | 0.017198 | 0.052911 | 0.000358 |
|  | ICP | ON | post-op 6w | 0.010888833 | 0.011759 | -0.01216 | 0.033936 | 0.708905 |
|  | SVP | ON | post-op 1d | -0.004670795 | 0.009683 | -0.02365 | 0.014308 | 1 |
|  | SVP | ON | post-op 2w | 0.022609311 | 0.006199 | 0.010459 | 0.034759 | 0.000795 |
|  | SVP | ON | post-op 6w | 0.004201903 | 0.008469 | -0.0124 | 0.020802 | 1 |
|  | DCP | OS | post-op 1d | -0.029689145 | 0.011719 | -0.05266 | -0.00672 | 0.033882 |
|  | DCP | OS | post-op 2w | 0.007810397 | 0.015019 | -0.02163 | 0.037247 | 0.603043 |
|  | DCP | OS | post-op 6w | -0.019679689 | 0.010974 | -0.04119 | 0.001829 | 0.145862 |
|  | ICP | OS | post-op 1d | -0.008813542 | 0.010227 | -0.02886 | 0.011231 | 0.777602 |
|  | ICP | OS | post-op 2w | 0.028354724 | 0.008378 | 0.011934 | 0.044775 | 0.00214 |
|  | ICP | OS | post-op 6w | -0.002203802 | 0.009543 | -0.02091 | 0.0165 | 0.817364 |
|  | SVP | OS | post-op 1d | 2.75063E-05 | 0.011322 | -0.02216 | 0.022219 | 1 |
|  | SVP | OS | post-op 2w | 0.033393981 | 0.008457 | 0.016818 | 0.04997 | 0.000236 |
|  | SVP | OS | post-op 6w | 0.000737438 | 0.010503 | -0.01985 | 0.021322 | 1 |
|  | DCP | OT | post-op 1d | -0.036762959 | 0.011687 | -0.05967 | -0.01386 | 0.004971 |
|  | DCP | OT | post-op 2w | -0.001369469 | 0.014967 | -0.0307 | 0.027966 | 0.927096 |
|  | DCP | OT | post-op 6w | -0.025248163 | 0.010562 | -0.04595 | -0.00455 | 0.033644 |
|  | ICP | OT | post-op 1d | -0.015058376 | 0.010425 | -0.03549 | 0.005374 | 0.445851 |
|  | ICP | OT | post-op 2w | 0.010266031 | 0.010999 | -0.01129 | 0.031824 | 0.701302 |
|  | ICP | OT | post-op 6w | -0.007833452 | 0.009316 | -0.02609 | 0.010425 | 0.701302 |
|  | SVP | OT | post-op 1d | 0.000492423 | 0.009548 | -0.01822 | 0.019206 | 1 |
|  | SVP | OT | post-op 2w | 0.020537367 | 0.009448 | 0.002019 | 0.039056 | 0.089199 |
|  | SVP | OT | post-op 6w | -0.002270348 | 0.010177 | -0.02222 | 0.017677 | 1 |
|  | DCP | W | post-op 1d | -0.02225591 | 0.008036 | -0.03801 | -0.00651 | 1 |
|  | DCP | W | post-op 2w | 0.004111173 | 0.009662 | -0.01483 | 0.023049 | 0.089199 |
|  | DCP | W | post-op 6w | -0.015182865 | 0.006616 | -0.02815 | -0.00221 | 1 |
|  | ICP | W | post-op 1d | -0.010276317 | 0.007158 | -0.02431 | 0.003752 | 0.302171 |
|  | ICP | W | post-op 2w | 0.019105472 | 0.00683 | 0.005719 | 0.032492 | 0.015462 |
|  | ICP | W | post-op 6w | -0.000997336 | 0.007282 | -0.01527 | 0.013275 | 0.891063 |
|  | SVP | W | post-op 1d | -0.001123498 | 0.008473 | -0.01773 | 0.015483 | 1 |
|  | SVP | W | post-op 2w | 0.020215823 | 0.006438 | 0.007598 | 0.032834 | 0.005067 |
|  | SVP | W | post-op 6w | -0.000512058 | 0.008458 | -0.01709 | 0.016066 | 1 |
| Conventional dose | DCP | F | post-op 1d | 0.006907 | 0.00391 | -0.00076 | 0.01457 | 0.231823 |
|  | DCP | F | post-op 2w | 0.001938 | 0.002192 | -0.00236 | 0.006234 | 0.376761 |
|  | DCP | F | post-op 6w | 0.004354 | 0.002879 | -0.00129 | 0.009997 | 0.260854 |
|  | ICP | F | post-op 1d | 0.007138 | 0.004451 | -0.00159 | 0.015861 | 0.326319 |
|  | ICP | F | post-op 2w | 0.011798 | 0.007527 | -0.00296 | 0.026551 | 0.326319 |
|  | ICP | F | post-op 6w | 0.004769 | 0.004903 | -0.00484 | 0.014379 | 0.33064 |
|  | SVP | F | post-op 1d | 0.011957 | 0.005696 | 0.000792 | 0.023121 | 0.107445 |
|  | SVP | F | post-op 2w | 0.013465 | 0.007007 | -0.00027 | 0.027198 | 0.109277 |
|  | SVP | F | post-op 6w | 0.009854 | 0.007591 | -0.00502 | 0.024733 | 0.194257 |
|  | DCP | II | post-op 1d | -0.00759 | 0.008777 | -0.0248 | 0.009609 | 0.941772 |
|  | DCP | II | post-op 2w | 0.00855 | 0.00849 | -0.00809 | 0.025191 | 0.941772 |
|  | DCP | II | post-op 6w | -0.00778 | 0.008709 | -0.02485 | 0.009291 | 0.941772 |
|  | ICP | II | post-op 1d | -0.00923 | 0.007789 | -0.0245 | 0.006037 | 0.440489 |
|  | ICP | II | post-op 2w | 0.020833 | 0.009263 | 0.002679 | 0.038988 | 0.073507 |
|  | ICP | II | post-op 6w | -0.00874 | 0.00713 | -0.02272 | 0.005234 | 0.440489 |
|  | SVP | II | post-op 1d | 0.001153 | 0.010979 | -0.02037 | 0.022672 | 1 |
|  | SVP | II | post-op 2w | 0.024732 | 0.010493 | 0.004166 | 0.045298 | 0.055275 |
|  | SVP | II | post-op 6w | 0.002255 | 0.010165 | -0.01767 | 0.022179 | 1 |
|  | DCP | IN | post-op 1d | -0.00704 | 0.008064 | -0.02284 | 0.00877 | 0.765885 |
|  | DCP | IN | post-op 2w | 0.010712 | 0.007764 | -0.0045 | 0.02593 | 0.50299 |
|  | DCP | IN | post-op 6w | -0.00385 | 0.007426 | -0.0184 | 0.010708 | 0.765885 |
|  | ICP | IN | post-op 1d | -0.00066 | 0.009096 | -0.01849 | 0.017166 | 1 |
|  | ICP | IN | post-op 2w | 0.036574 | 0.010887 | 0.015235 | 0.057913 | 0.002344 |
|  | ICP | IN | post-op 6w | 0.00227 | 0.008633 | -0.01465 | 0.01919 | 1 |
|  | SVP | IN | post-op 1d | -0.00413 | 0.009426 | -0.0226 | 0.014349 | 1 |
|  | SVP | IN | post-op 2w | 0.02197 | 0.008828 | 0.004666 | 0.039273 | 0.038482 |
|  | SVP | IN | post-op 6w | 0.002301 | 0.00901 | -0.01536 | 0.019961 | 1 |
|  | DCP | IS | post-op 1d | -0.00306 | 0.008807 | -0.02033 | 0.014196 | 1 |
|  | DCP | IS | post-op 2w | 0.012587 | 0.008127 | -0.00334 | 0.028515 | 0.364265 |
|  | DCP | IS | post-op 6w | -0.0005 | 0.008356 | -0.01688 | 0.015874 | 1 |
|  | ICP | IS | post-op 1d | -0.00804 | 0.008289 | -0.02429 | 0.008201 | 0.663537 |
|  | ICP | IS | post-op 2w | 0.022999 | 0.008836 | 0.005681 | 0.040318 | 0.027738 |
|  | ICP | IS | post-op 6w | -0.0036 | 0.007091 | -0.0175 | 0.010301 | 0.663537 |
|  | SVP | IS | post-op 1d | 0.009583 | 0.00987 | -0.00976 | 0.028929 | 0.6632 |
|  | SVP | IS | post-op 2w | 0.026479 | 0.009147 | 0.008551 | 0.044406 | 0.011381 |
|  | SVP | IS | post-op 6w | 0.001437 | 0.009242 | -0.01668 | 0.019551 | 0.876398 |
|  | DCP | IT | post-op 1d | -0.00887 | 0.007673 | -0.02391 | 0.006167 | 0.742746 |
|  | DCP | IT | post-op 2w | 0.010033 | 0.009774 | -0.00912 | 0.02919 | 0.742746 |
|  | DCP | IT | post-op 6w | -0.00769 | 0.009491 | -0.02629 | 0.010916 | 0.742746 |
|  | ICP | IT | post-op 1d | -0.01386 | 0.009307 | -0.0321 | 0.004379 | 0.331313 |
|  | ICP | IT | post-op 2w | 0.015593 | 0.009769 | -0.00355 | 0.03474 | 0.331313 |
|  | ICP | IT | post-op 6w | -0.00916 | 0.00848 | -0.02578 | 0.007458 | 0.331313 |
|  | SVP | IT | post-op 1d | 0.004307 | 0.009629 | -0.01456 | 0.023178 | 1 |
|  | SVP | IT | post-op 2w | 0.01878 | 0.009394 | 0.000368 | 0.037192 | 0.136794 |
|  | SVP | IT | post-op 6w | -0.00101 | 0.009017 | -0.01868 | 0.016662 | 1 |
|  | DCP | OI | post-op 1d | -0.02744 | 0.013132 | -0.05318 | -0.0017 | 0.109959 |
|  | DCP | OI | post-op 2w | -0.00588 | 0.014625 | -0.03454 | 0.022789 | 0.687888 |
|  | DCP | OI | post-op 6w | -0.02546 | 0.012424 | -0.04981 | -0.00111 | 0.109959 |
|  | ICP | OI | post-op 1d | -0.0378 | 0.035359 | -0.10711 | 0.031499 | 0.855007 |
|  | ICP | OI | post-op 2w | -0.01688 | 0.035876 | -0.08719 | 0.05344 | 0.855007 |
|  | ICP | OI | post-op 6w | -0.03058 | 0.037295 | -0.10367 | 0.042521 | 0.855007 |
|  | SVP | OI | post-op 1d | -0.0057 | 0.011538 | -0.02832 | 0.01691 | 1 |
|  | SVP | OI | post-op 2w | 0.011153 | 0.010444 | -0.00932 | 0.031623 | 0.856719 |
|  | SVP | OI | post-op 6w | -0.00584 | 0.011938 | -0.02924 | 0.017553 | 1 |
|  | DCP | ON | post-op 1d | -0.02165 | 0.009141 | -0.03956 | -0.00373 | 0.053634 |
|  | DCP | ON | post-op 2w | 0.005998 | 0.008953 | -0.01155 | 0.023546 | 0.502858 |
|  | DCP | ON | post-op 6w | -0.01444 | 0.007821 | -0.02977 | 0.00089 | 0.129741 |
|  | ICP | ON | post-op 1d | -0.00735 | 0.009425 | -0.02582 | 0.011126 | 0.708905 |
|  | ICP | ON | post-op 2w | 0.035055 | 0.00911 | 0.017198 | 0.052911 | 0.000358 |
|  | ICP | ON | post-op 6w | 0.010889 | 0.011759 | -0.01216 | 0.033936 | 0.708905 |
|  | SVP | ON | post-op 1d | -0.00467 | 0.009683 | -0.02365 | 0.014308 | 1 |
|  | SVP | ON | post-op 2w | 0.022609 | 0.006199 | 0.010459 | 0.034759 | 0.000795 |
|  | SVP | ON | post-op 6w | 0.004202 | 0.008469 | -0.0124 | 0.020802 | 1 |
|  | DCP | OS | post-op 1d | -0.02969 | 0.011719 | -0.05266 | -0.00672 | 0.033882 |
|  | DCP | OS | post-op 2w | 0.00781 | 0.015019 | -0.02163 | 0.037247 | 0.603043 |
|  | DCP | OS | post-op 6w | -0.01968 | 0.010974 | -0.04119 | 0.001829 | 0.145862 |
|  | ICP | OS | post-op 1d | -0.00881 | 0.010227 | -0.02886 | 0.011231 | 0.777602 |
|  | ICP | OS | post-op 2w | 0.028355 | 0.008378 | 0.011934 | 0.044775 | 0.00214 |
|  | ICP | OS | post-op 6w | -0.0022 | 0.009543 | -0.02091 | 0.0165 | 0.817364 |
|  | SVP | OS | post-op 1d | 2.75E-05 | 0.011322 | -0.02216 | 0.022219 | 1 |
|  | SVP | OS | post-op 2w | 0.033394 | 0.008457 | 0.016818 | 0.04997 | 0.000236 |
|  | SVP | OS | post-op 6w | 0.000737 | 0.010503 | -0.01985 | 0.021322 | 1 |
|  | DCP | OT | post-op 1d | -0.03676 | 0.011687 | -0.05967 | -0.01386 | 0.004971 |
|  | DCP | OT | post-op 2w | -0.00137 | 0.014967 | -0.0307 | 0.027966 | 0.927096 |
|  | DCP | OT | post-op 6w | -0.02525 | 0.010562 | -0.04595 | -0.00455 | 0.033644 |
|  | ICP | OT | post-op 1d | -0.01506 | 0.010425 | -0.03549 | 0.005374 | 0.445851 |
|  | ICP | OT | post-op 2w | 0.010266 | 0.010999 | -0.01129 | 0.031824 | 0.701302 |
|  | ICP | OT | post-op 6w | -0.00783 | 0.009316 | -0.02609 | 0.010425 | 0.701302 |
|  | SVP | OT | post-op 1d | 0.000492 | 0.009548 | -0.01822 | 0.019206 | 1 |
|  | SVP | OT | post-op 2w | 0.020537 | 0.009448 | 0.002019 | 0.039056 | 0.089199 |
|  | SVP | OT | post-op 6w | -0.00227 | 0.010177 | -0.02222 | 0.017677 | 1 |
|  | DCP | W | post-op 1d | -0.02226 | 0.008036 | -0.03801 | -0.00651 | 1 |
|  | DCP | W | post-op 2w | 0.004111 | 0.009662 | -0.01483 | 0.023049 | 0.089199 |
|  | DCP | W | post-op 6w | -0.01518 | 0.006616 | -0.02815 | -0.00221 | 1 |
|  | ICP | W | post-op 1d | -0.01028 | 0.007158 | -0.02431 | 0.003752 | 0.302171 |
|  | ICP | W | post-op 2w | 0.019105 | 0.00683 | 0.005719 | 0.032492 | 0.015462 |
|  | ICP | W | post-op 6w | -0.001 | 0.007282 | -0.01527 | 0.013275 | 0.891063 |
|  | SVP | W | post-op 1d | -0.00112 | 0.008473 | -0.01773 | 0.015483 | 1 |
|  | SVP | W | post-op 2w | 0.020216 | 0.006438 | 0.007598 | 0.032834 | 0.005067 |
|  | SVP | W | post-op 6w | -0.00051 | 0.008458 | -0.01709 | 0.016066 | 1 |

β represents the estimated marginal mean (EMM) difference versus baseline. P values are Holm-adjusted for multiple comparisons within each model. W=Whole; F=Foveal; S= Superior; T= Temporal; I= Inferior; N= Nasal; SVP=superficial vascular plexus; ICP= intermediate capillary plexus; DCP=deep capillary plexus.

Supplementary Table S2. Longitudinal changes in vessel skeleton density (VSD) relative to baseline (Holm-adjusted).

| **Group** | **Layer** | **Region** | **Time** | **β** | **SE** | **CI_low** | **CI_high** | **p value** |
| --- | --- | --- | --- | --- | --- | --- | --- | --- |
| Supranormal dose | DCP | F | post-op 1d | -0.00097 | 0.001351 | -0.00361 | 0.001682 | 1 |
|  | DCP | F | post-op 2w | -0.001 | 0.001513 | -0.00397 | 0.00196 | 1 |
|  | DCP | F | post-op 6w | 0.00103 | 0.00219 | -0.00326 | 0.005323 | 1 |
|  | ICP | F | post-op 1d | -0.00187 | 0.003085 | -0.00792 | 0.004173 | 1 |
|  | ICP | F | post-op 2w | -0.00066 | 0.003189 | -0.00691 | 0.005592 | 1 |
|  | ICP | F | post-op 6w | 0.000761 | 0.003601 | -0.0063 | 0.007818 | 1 |
|  | SVP | F | post-op 1d | -0.00224 | 0.002178 | -0.00651 | 0.002024 | 0.908253 |
|  | SVP | F | post-op 2w | 0.00175 | 0.003004 | -0.00414 | 0.007637 | 1 |
|  | SVP | F | post-op 6w | -0.00056 | 0.002993 | -0.00643 | 0.005305 | 1 |
|  | DCP | II | post-op 1d | -0.00485 | 0.00487 | -0.0144 | 0.004696 | 0.638697 |
|  | DCP | II | post-op 2w | 0.009863 | 0.003888 | 0.002243 | 0.017483 | 0.033549 |
|  | DCP | II | post-op 6w | 0.00553 | 0.005772 | -0.00578 | 0.016843 | 0.638697 |
|  | ICP | II | post-op 1d | 0.000334 | 0.00387 | -0.00725 | 0.00792 | 0.931162 |
|  | ICP | II | post-op 2w | 0.014395 | 0.005761 | 0.003104 | 0.025686 | 0.037377 |
|  | ICP | II | post-op 6w | 0.008316 | 0.004229 | 2.72E-05 | 0.016604 | 0.098508 |
|  | SVP | II | post-op 1d | -0.00407 | 0.005377 | -0.01461 | 0.006466 | 0.897752 |
|  | SVP | II | post-op 2w | 0.007421 | 0.005714 | -0.00378 | 0.018621 | 0.582083 |
|  | SVP | II | post-op 6w | 0.002879 | 0.005118 | -0.00715 | 0.01291 | 0.897752 |
|  | DCP | IN | post-op 1d | -0.00776 | 0.003844 | -0.0153 | -0.00023 | 0.13023 |
|  | DCP | IN | post-op 2w | 0.000936 | 0.003474 | -0.00587 | 0.007744 | 1 |
|  | DCP | IN | post-op 6w | -0.00165 | 0.006356 | -0.0141 | 0.010812 | 1 |
|  | ICP | IN | post-op 1d | -0.00157 | 0.005502 | -0.01235 | 0.009215 | 0.846476 |
|  | ICP | IN | post-op 2w | 0.013359 | 0.010225 | -0.00668 | 0.0334 | 0.574241 |
|  | ICP | IN | post-op 6w | 0.006955 | 0.008685 | -0.01007 | 0.023978 | 0.846476 |
|  | SVP | IN | post-op 1d | -0.00616 | 0.004047 | -0.0141 | 0.00177 | 0.383551 |
|  | SVP | IN | post-op 2w | 0.007972 | 0.008358 | -0.00841 | 0.024353 | 0.680388 |
|  | SVP | IN | post-op 6w | 0.003095 | 0.006415 | -0.00948 | 0.015668 | 0.680388 |
|  | DCP | IS | post-op 1d | -0.00341 | 0.007114 | -0.01735 | 0.010532 | 0.811173 |
|  | DCP | IS | post-op 2w | 0.009939 | 0.005515 | -0.00087 | 0.020749 | 0.214521 |
|  | DCP | IS | post-op 6w | 0.005231 | 0.006289 | -0.0071 | 0.017558 | 0.811173 |
|  | ICP | IS | post-op 1d | -0.0012 | 0.004816 | -0.01064 | 0.008236 | 0.802815 |
|  | ICP | IS | post-op 2w | 0.008569 | 0.005378 | -0.00197 | 0.01911 | 0.333226 |
|  | ICP | IS | post-op 6w | 0.005359 | 0.004234 | -0.00294 | 0.013658 | 0.411372 |
|  | SVP | IS | post-op 1d | -0.00729 | 0.005805 | -0.01867 | 0.00409 | 0.627984 |
|  | SVP | IS | post-op 2w | 0.00185 | 0.006895 | -0.01166 | 0.015364 | 1 |
|  | SVP | IS | post-op 6w | -0.00012 | 0.005815 | -0.01151 | 0.011281 | 1 |
|  | DCP | ON | post-op 1d | 0.000181 | 0.005758 | -0.01111 | 0.011467 | 0.974951 |
|  | DCP | ON | post-op 2w | 0.012833 | 0.006288 | 0.00051 | 0.025156 | 0.082493 |
|  | DCP | ON | post-op 6w | 0.012527 | 0.005218 | 0.0023 | 0.022755 | 0.049083 |
|  | ICP | ON | post-op 1d | -0.0078 | 0.006704 | -0.02094 | 0.005341 | 0.73409 |
|  | ICP | ON | post-op 2w | 0.010147 | 0.011627 | -0.01264 | 0.032936 | 0.765724 |
|  | ICP | ON | post-op 6w | 0.004081 | 0.010409 | -0.01632 | 0.024482 | 0.765724 |
|  | SVP | ON | post-op 1d | -0.00453 | 0.00386 | -0.01209 | 0.003036 | 0.481296 |
|  | SVP | ON | post-op 2w | 0.010274 | 0.006922 | -0.00329 | 0.023841 | 0.413207 |
|  | SVP | ON | post-op 6w | 0.00517 | 0.005752 | -0.0061 | 0.016444 | 0.481296 |
|  | DCP | OS | post-op 1d | -0.00385 | 0.004192 | -0.01207 | 0.004365 | 0.358217 |
|  | DCP | OS | post-op 2w | 0.014356 | 0.007653 | -0.00064 | 0.029356 | 0.12137 |
|  | DCP | OS | post-op 6w | 0.012647 | 0.005065 | 0.002719 | 0.022575 | 0.037597 |
|  | ICP | OS | post-op 1d | -0.0035 | 0.003861 | -0.01106 | 0.00407 | 1 |
|  | ICP | OS | post-op 2w | 0.000751 | 0.0037 | -0.0065 | 0.008003 | 1 |
|  | ICP | OS | post-op 6w | -0.00358 | 0.005646 | -0.01464 | 0.007489 | 1 |
|  | SVP | OS | post-op 1d | -0.00667 | 0.003852 | -0.01422 | 0.000877 | 0.249706 |
|  | SVP | OS | post-op 2w | 0.003423 | 0.003104 | -0.00266 | 0.009507 | 0.540087 |
|  | SVP | OS | post-op 6w | -0.00021 | 0.004681 | -0.00939 | 0.008962 | 0.963565 |
|  | DCP | OT | post-op 1d | -0.00014 | 0.004805 | -0.00956 | 0.009278 | 0.97696 |
|  | DCP | OT | post-op 2w | 0.010759 | 0.006726 | -0.00242 | 0.023942 | 0.329086 |
|  | DCP | OT | post-op 6w | 0.008614 | 0.007331 | -0.00575 | 0.022983 | 0.479941 |
|  | ICP | OT | post-op 1d | 0.000604 | 0.006851 | -0.01282 | 0.014031 | 1 |
|  | ICP | OT | post-op 2w | 0.002384 | 0.010089 | -0.01739 | 0.022157 | 1 |
|  | ICP | OT | post-op 6w | 0.00057 | 0.010714 | -0.02043 | 0.021569 | 1 |
|  | SVP | OT | post-op 1d | -0.00227 | 0.005714 | -0.01347 | 0.008929 | 1 |
|  | SVP | OT | post-op 2w | -0.00117 | 0.004826 | -0.01063 | 0.008293 | 1 |
|  | SVP | OT | post-op 6w | -0.00252 | 0.007361 | -0.01694 | 0.011911 | 1 |
|  | DCP | IT | post-op 1d | -0.00139 | 0.007202 | -0.0155 | 0.012726 | 1 |
|  | DCP | IT | post-op 2w | 0.007218 | 0.004927 | -0.00244 | 0.016874 | 0.428835 |
|  | DCP | IT | post-op 6w | 0.001703 | 0.005456 | -0.00899 | 0.012397 | 1 |
|  | ICP | IT | post-op 1d | -0.00147 | 0.004348 | -0.00999 | 0.007053 | 0.735452 |
|  | ICP | IT | post-op 2w | 0.013359 | 0.00392 | 0.005675 | 0.021042 | 0.001966 |
|  | ICP | IT | post-op 6w | 0.008328 | 0.005383 | -0.00222 | 0.018878 | 0.243583 |
|  | SVP | IT | post-op 1d | -0.00249 | 0.005413 | -0.0131 | 0.008121 | 1 |
|  | SVP | IT | post-op 2w | 0.002801 | 0.004067 | -0.00517 | 0.010772 | 1 |
|  | SVP | IT | post-op 6w | 0.00174 | 0.005202 | -0.00846 | 0.011936 | 1 |
|  | DCP | OI | post-op 1d | -0.00084 | 0.002283 | -0.00531 | 0.003634 | 0.713048 |
|  | DCP | OI | post-op 2w | 0.012282 | 0.003839 | 0.004759 | 0.019806 | 0.003342 |
|  | DCP | OI | post-op 6w | 0.009748 | 0.00299 | 0.003887 | 0.015609 | 0.003342 |
|  | ICP | OI | post-op 1d | 0.003907 | 0.005342 | -0.00656 | 0.014376 | 0.929102 |
|  | ICP | OI | post-op 2w | 0.008418 | 0.005103 | -0.00158 | 0.01842 | 0.297096 |
|  | ICP | OI | post-op 6w | 0.003104 | 0.005315 | -0.00731 | 0.013521 | 0.929102 |
|  | SVP | OI | post-op 1d | 0.000472 | 0.004058 | -0.00748 | 0.008426 | 0.98309 |
|  | SVP | OI | post-op 2w | 0.009623 | 0.003215 | 0.003322 | 0.015925 | 0.008286 |
|  | SVP | OI | post-op 6w | 0.003255 | 0.004731 | -0.00602 | 0.012528 | 0.98309 |
|  | DCP | W | post-op 1d | -0.00124 | 0.003244 | -0.0076 | 0.005117 | 0.701989 |
|  | DCP | W | post-op 2w | 0.010994 | 0.003881 | 0.003388 | 0.0186 | 0.012884 |
|  | DCP | W | post-op 6w | 0.009581 | 0.003355 | 0.003005 | 0.016157 | 0.012884 |
|  | ICP | W | post-op 1d | -0.00135 | 0.003602 | -0.00841 | 0.005709 | 1 |
|  | ICP | W | post-op 2w | 0.00658 | 0.002383 | 0.00191 | 0.011251 | 0.017255 |
|  | ICP | W | post-op 6w | 0.00129 | 0.003469 | -0.00551 | 0.008088 | 1 |
|  | SVP | W | post-op 1d | -0.00271 | 0.003065 | -0.00871 | 0.003301 | 0.754638 |
|  | SVP | W | post-op 2w | 0.004764 | 0.001998 | 0.000847 | 0.008681 | 0.051372 |
|  | SVP | W | post-op 6w | 0.000528 | 0.003953 | -0.00722 | 0.008277 | 0.893708 |
| Conventional dose | SVP | OS | post-op 1d | 0.000311 | 0.003232 | -0.006023 | 0.006646 | 1.000000 |
|  | SVP | OS | post-op 2w | 0.009018 | 0.002477 | 0.004163 | 0.013873 | 0.000816 |
|  | SVP | OS | post-op 6w | 0.000310 | 0.003057 | -0.005683 | 0.006302 | 1.000000 |
|  | DCP | OT | post-op 1d | -0.010171 | 0.003735 | -0.017491 | -0.002852 | 0.019376 |
|  | DCP | OT | post-op 2w | -0.001420 | 0.003609 | -0.008495 | 0.005654 | 0.693930 |
|  | DCP | OT | post-op 6w | -0.005825 | 0.003462 | -0.012610 | 0.000959 | 0.184826 |
|  | ICP | OT | post-op 1d | -0.004299 | 0.003784 | -0.011715 | 0.003117 | 0.767659 |
|  | ICP | OT | post-op 2w | 0.002623 | 0.003844 | -0.004910 | 0.010157 | 0.989793 |
|  | ICP | OT | post-op 6w | -0.000766 | 0.004551 | -0.009686 | 0.008155 | 0.989793 |
|  | SVP | OT | post-op 1d | 0.000848 | 0.003230 | -0.005483 | 0.007180 | 1.000000 |
|  | SVP | OT | post-op 2w | 0.004148 | 0.002991 | -0.001713 | 0.010010 | 0.496192 |
|  | SVP | OT | post-op 6w | 0.000301 | 0.003800 | -0.007147 | 0.007750 | 1.000000 |
|  | DCP | IT | post-op 1d | -0.001232 | 0.003321 | -0.007742 | 0.005277 | 1.000000 |
|  | DCP | IT | post-op 2w | 0.004488 | 0.004206 | -0.003755 | 0.012732 | 0.857657 |
|  | DCP | IT | post-op 6w | -0.000703 | 0.003884 | -0.008315 | 0.006909 | 1.000000 |
|  | ICP | IT | post-op 1d | -0.001695 | 0.003299 | -0.008161 | 0.004771 | 1.000000 |
|  | ICP | IT | post-op 2w | 0.008911 | 0.003414 | 0.002220 | 0.015601 | 0.027136 |
|  | ICP | IT | post-op 6w | -0.000223 | 0.003057 | -0.006215 | 0.005769 | 1.000000 |
|  | SVP | IT | post-op 1d | 0.003174 | 0.003371 | -0.003433 | 0.009780 | 0.692849 |
|  | SVP | IT | post-op 2w | 0.006633 | 0.003520 | -0.000266 | 0.013531 | 0.178490 |
|  | SVP | IT | post-op 6w | 0.001466 | 0.003538 | -0.005470 | 0.008401 | 0.692849 |
|  | DCP | OI | post-op 1d | -0.226922 | 0.217870 | -0.653939 | 0.200096 | 0.892869 |
|  | DCP | OI | post-op 2w | -0.220310 | 0.217658 | -0.646911 | 0.206291 | 0.892869 |
|  | DCP | OI | post-op 6w | -0.226549 | 0.218128 | -0.654073 | 0.200974 | 0.892869 |
|  | ICP | OI | post-op 1d | -0.000174 | 0.003353 | -0.006745 | 0.006398 | 0.958663 |
|  | ICP | OI | post-op 2w | 0.007016 | 0.004323 | -0.001457 | 0.015489 | 0.313795 |
|  | ICP | OI | post-op 6w | 0.003235 | 0.004438 | -0.005463 | 0.011934 | 0.932058 |
|  | SVP | OI | post-op 1d | -0.000673 | 0.003599 | -0.007727 | 0.006381 | 1.000000 |
|  | SVP | OI | post-op 2w | 0.004679 | 0.003253 | -0.001697 | 0.011055 | 0.451127 |
|  | SVP | OI | post-op 6w | 0.000402 | 0.003689 | -0.006828 | 0.007632 | 1.000000 |
|  | DCP | W | post-op 1d | -0.006433 | 0.002454 | -0.011243 | -0.001623 | 0.026265 |
|  | DCP | W | post-op 2w | 0.002492 | 0.002540 | -0.002487 | 0.007470 | 0.326591 |
|  | DCP | W | post-op 6w | -0.003903 | 0.001987 | -0.007798 | -0.000008 | 0.099013 |
|  | ICP | W | post-op 1d | -0.001769 | 0.002266 | -0.006210 | 0.002672 | 0.869929 |
|  | ICP | W | post-op 2w | 0.007850 | 0.002702 | 0.002554 | 0.013146 | 0.011012 |
|  | ICP | W | post-op 6w | 0.001240 | 0.002938 | -0.004518 | 0.006998 | 0.869929 |
|  | SVP | W | post-op 1d | 0.000071 | 0.002630 | -0.005085 | 0.005226 | 1.000000 |
|  | SVP | W | post-op 2w | 0.005869 | 0.002368 | 0.001229 | 0.010510 | 0.039542 |
|  | SVP | W | post-op 6w | 0.000774 | 0.002842 | -0.004797 | 0.006345 | 1.000000 |

β represents the estimated marginal mean (EMM) difference versus baseline. P values are Holm-adjusted for multiple comparisons within each model. W=Whole; F=Foveal; S= Superior; T= Temporal; I= Inferior; N= Nasal; SVP=superficial vascular plexus; ICP= intermediate capillary plexus; DCP=deep capillary plexus.

Supplementary Table S3. Longitudinal changes in vessel diameter index (VDI) relative to baseline (Holm-adjusted).

| **Group** | **Layer** | **Region** | **Time** | **β** | **SE** | **CI_low** | **CI_high** | **p value** |
| --- | --- | --- | --- | --- | --- | --- | --- | --- |
| Supranormal dose | DCP | F | post-op 1d | 0.245124 | 0.156503 | -0.06162 | 0.551865 | 0.11729 |
|  | DCP | F | post-op 2w | 0.355081 | 0.178704 | 0.004827 | 0.705335 | 0.093851 |
|  | DCP | F | post-op 6w | 0.380686 | 0.125739 | 0.134242 | 0.627131 | 0.007395 |
|  | ICP | F | post-op 1d | 0.089194 | 0.136663 | -0.17866 | 0.357049 | 1 |
|  | ICP | F | post-op 2w | 0.018898 | 0.130862 | -0.23759 | 0.275382 | 1 |
|  | ICP | F | post-op 6w | 0.17851 | 0.121104 | -0.05885 | 0.415869 | 0.421419 |
|  | SVP | F | post-op 1d | 0.043091 | 0.174523 | -0.29897 | 0.385149 | 1 |
|  | SVP | F | post-op 2w | 0.037395 | 0.191339 | -0.33762 | 0.412413 | 1 |
|  | SVP | F | post-op 6w | -0.00262 | 0.165743 | -0.32747 | 0.322234 | 1 |
|  | DCP | II | post-op 1d | -0.15077 | 0.081868 | -0.31123 | 0.009688 | 0.196587 |
|  | DCP | II | post-op 2w | 0.047061 | 0.099396 | -0.14775 | 0.241873 | 0.635873 |
|  | DCP | II | post-op 6w | -0.09008 | 0.077868 | -0.2427 | 0.062537 | 0.494675 |
|  | ICP | II | post-op 1d | -0.13286 | 0.171233 | -0.46847 | 0.202748 | 0.875599 |
|  | ICP | II | post-op 2w | -0.06404 | 0.170618 | -0.39845 | 0.270361 | 0.875599 |
|  | ICP | II | post-op 6w | -0.27049 | 0.09641 | -0.45945 | -0.08153 | 0.015066 |
|  | SVP | II | post-op 1d | -0.03227 | 0.083064 | -0.19508 | 0.130531 | 1 |
|  | SVP | II | post-op 2w | -0.03682 | 0.15247 | -0.33565 | 0.262017 | 1 |
|  | SVP | II | post-op 6w | -0.144 | 0.080482 | -0.30174 | 0.013743 | 0.220743 |
|  | DCP | IN | post-op 1d | -0.20057 | 0.113465 | -0.42296 | 0.021816 | 0.154225 |
|  | DCP | IN | post-op 2w | 0.069581 | 0.14335 | -0.21138 | 0.350541 | 0.627401 |
|  | DCP | IN | post-op 6w | -0.15376 | 0.073052 | -0.29694 | -0.01059 | 0.10591 |
|  | ICP | IN | post-op 1d | -0.1784 | 0.103894 | -0.38203 | 0.025228 | 0.254433 |
|  | ICP | IN | post-op 2w | -0.00642 | 0.137147 | -0.27523 | 0.262379 | 0.96264 |
|  | ICP | IN | post-op 6w | -0.20628 | 0.119689 | -0.44086 | 0.028311 | 0.254433 |
|  | SVP | IN | post-op 1d | -0.20611 | 0.130945 | -0.46276 | 0.050536 | 0.346441 |
|  | SVP | IN | post-op 2w | -0.0588 | 0.155611 | -0.36379 | 0.246195 | 0.705547 |
|  | SVP | IN | post-op 6w | -0.16369 | 0.123409 | -0.40557 | 0.078184 | 0.369399 |
|  | DCP | IS | post-op 1d | -0.1699 | 0.103875 | -0.37349 | 0.03369 | 0.305752 |
|  | DCP | IS | post-op 2w | 0.002749 | 0.099107 | -0.1915 | 0.196995 | 0.977872 |
|  | DCP | IS | post-op 6w | -0.09909 | 0.083144 | -0.26205 | 0.063873 | 0.46672 |
|  | ICP | IS | post-op 1d | -0.10965 | 0.121483 | -0.34776 | 0.128449 | 1 |
|  | ICP | IS | post-op 2w | 0.058031 | 0.132473 | -0.20161 | 0.317673 | 1 |
|  | ICP | IS | post-op 6w | 0.041946 | 0.113317 | -0.18015 | 0.264043 | 1 |
|  | SVP | IS | post-op 1d | -0.15534 | 0.114706 | -0.38016 | 0.069481 | 0.351324 |
|  | SVP | IS | post-op 2w | -0.08207 | 0.136307 | -0.34922 | 0.185088 | 0.547118 |
|  | SVP | IS | post-op 6w | -0.19174 | 0.105616 | -0.39874 | 0.015265 | 0.208373 |
|  | DCP | ON | post-op 1d | -0.10358 | 0.117732 | -0.33433 | 0.12717 | 0.757937 |
|  | DCP | ON | post-op 2w | 0.182637 | 0.12081 | -0.05415 | 0.419419 | 0.391777 |
|  | DCP | ON | post-op 6w | -0.01785 | 0.094411 | -0.2029 | 0.167189 | 0.850014 |
|  | ICP | ON | post-op 1d | -0.14114 | 0.128884 | -0.39375 | 0.111468 | 0.820434 |
|  | ICP | ON | post-op 2w | -0.05029 | 0.164694 | -0.37308 | 0.272505 | 0.820434 |
|  | ICP | ON | post-op 6w | -0.12507 | 0.144685 | -0.40865 | 0.158508 | 0.820434 |
|  | SVP | ON | post-op 1d | -0.07118 | 0.101162 | -0.26945 | 0.127099 | 1 |
|  | SVP | ON | post-op 2w | 0.01426 | 0.099683 | -0.18111 | 0.209634 | 1 |
|  | SVP | ON | post-op 6w | 0.021849 | 0.100999 | -0.17611 | 0.219804 | 1 |
|  | DCP | OS | post-op 1d | -0.16137 | 0.115738 | -0.38821 | 0.065473 | 0.489713 |
|  | DCP | OS | post-op 2w | 0.11921 | 0.128822 | -0.13328 | 0.371695 | 0.489713 |
|  | DCP | OS | post-op 6w | -0.11792 | 0.098589 | -0.31115 | 0.075311 | 0.489713 |
|  | ICP | OS | post-op 1d | -0.55256 | 0.182079 | -0.90943 | -0.1957 | 0.007222 |
|  | ICP | OS | post-op 2w | -0.12801 | 0.255054 | -0.62791 | 0.371881 | 0.615728 |
|  | ICP | OS | post-op 6w | -0.39333 | 0.213334 | -0.81145 | 0.024802 | 0.130452 |
|  | SVP | OS | post-op 1d | -0.21607 | 0.113298 | -0.43813 | 0.005986 | 0.169512 |
|  | SVP | OS | post-op 2w | -0.2178 | 0.123393 | -0.45965 | 0.024042 | 0.169512 |
|  | SVP | OS | post-op 6w | -0.08196 | 0.121748 | -0.32058 | 0.156661 | 0.500823 |
|  | DCP | OT | post-op 1d | -0.22442 | 0.094059 | -0.40878 | -0.04007 | 0.0511 |
|  | DCP | OT | post-op 2w | 0.000283 | 0.131791 | -0.25802 | 0.258589 | 0.998287 |
|  | DCP | OT | post-op 6w | -0.08201 | 0.091386 | -0.26112 | 0.097104 | 0.739017 |
|  | ICP | OT | post-op 1d | -0.18181 | 0.114887 | -0.40698 | 0.043363 | 0.340594 |
|  | ICP | OT | post-op 2w | -0.00976 | 0.15987 | -0.3231 | 0.30358 | 1 |
|  | ICP | OT | post-op 6w | -0.02734 | 0.136689 | -0.29525 | 0.240562 | 1 |
|  | SVP | OT | post-op 1d | -0.11136 | 0.089676 | -0.28712 | 0.0644 | 0.428603 |
|  | SVP | OT | post-op 2w | 0.04005 | 0.130312 | -0.21536 | 0.295457 | 0.758587 |
|  | SVP | OT | post-op 6w | -0.13828 | 0.08772 | -0.31021 | 0.033651 | 0.344836 |
|  | DCP | IT | post-op 1d | -0.12251 | 0.091906 | -0.30264 | 0.057626 | 0.453198 |
|  | DCP | IT | post-op 2w | 0.050928 | 0.112134 | -0.16885 | 0.270708 | 0.649703 |
|  | DCP | IT | post-op 6w | -0.11179 | 0.07786 | -0.26439 | 0.040813 | 0.453198 |
|  | ICP | IT | post-op 1d | -0.34858 | 0.142823 | -0.62851 | -0.06866 | 0.043981 |
|  | ICP | IT | post-op 2w | -0.1493 | 0.161387 | -0.46561 | 0.167012 | 0.650462 |
|  | ICP | IT | post-op 6w | -0.12461 | 0.126663 | -0.37286 | 0.123649 | 0.650462 |
|  | SVP | IT | post-op 1d | -0.32191 | 0.142245 | -0.6007 | -0.04311 | 0.070898 |
|  | SVP | IT | post-op 2w | -0.17437 | 0.152731 | -0.47372 | 0.124975 | 0.253581 |
|  | SVP | IT | post-op 6w | -0.22389 | 0.111896 | -0.4432 | -0.00457 | 0.090819 |
|  | DCP | OI | post-op 1d | -0.10296 | 0.100616 | -0.30017 | 0.094239 | 0.65402 |
|  | DCP | OI | post-op 2w | 0.147499 | 0.119738 | -0.08718 | 0.382181 | 0.65402 |
|  | DCP | OI | post-op 6w | 0.026545 | 0.079825 | -0.12991 | 0.182999 | 0.739477 |
|  | ICP | OI | post-op 1d | -0.45065 | 0.197298 | -0.83735 | -0.06395 | 0.044731 |
|  | ICP | OI | post-op 2w | -0.47637 | 0.171778 | -0.81305 | -0.13969 | 0.016654 |
|  | ICP | OI | post-op 6w | -0.20886 | 0.246754 | -0.69249 | 0.274772 | 0.39732 |
|  | SVP | OI | post-op 1d | -0.18743 | 0.145684 | -0.47297 | 0.098105 | 0.396497 |
|  | SVP | OI | post-op 2w | -0.3211 | 0.141088 | -0.59763 | -0.04457 | 0.068557 |
|  | SVP | OI | post-op 6w | -0.11534 | 0.152948 | -0.41511 | 0.184436 | 0.450795 |
|  | DCP | W | post-op 1d | -0.21908 | 0.081899 | -0.3796 | -0.05856 | 0.022421 |
|  | DCP | W | post-op 2w | -0.00053 | 0.111123 | -0.21832 | 0.217271 | 0.996228 |
|  | DCP | W | post-op 6w | -0.12243 | 0.078541 | -0.27637 | 0.031507 | 0.238081 |
|  | ICP | W | post-op 1d | -0.2876 | 0.07977 | -0.44395 | -0.13125 | 0.000935 |
|  | ICP | W | post-op 2w | -0.13494 | 0.11957 | -0.36929 | 0.099415 | 0.270786 |
|  | ICP | W | post-op 6w | -0.15888 | 0.106407 | -0.36744 | 0.04967 | 0.270786 |
|  | SVP | W | post-op 1d | -0.12772 | 0.086907 | -0.29806 | 0.042615 | 0.424995 |
|  | SVP | W | post-op 2w | -0.11363 | 0.11011 | -0.32945 | 0.102177 | 0.509307 |
|  | **SVP** | W | post-op 6w | -0.11574 | 0.101603 | -0.31488 | 0.0834 | 0.509307 |
| Conventional dose | DCP | F | post-op 1d | 0.245124 | 0.156503 | -0.061617508 | 0.551865 | 0.11729 |
|  | DCP | F | post-op 2w | 0.355081 | 0.178704 | 0.004826543 | 0.705335 | 0.093851 |
|  | DCP | F | post-op 6w | 0.380686 | 0.125739 | 0.134242055 | 0.627131 | 0.007395 |
|  | ICP | F | post-op 1d | 0.089194 | 0.136663 | -0.178661838 | 0.357049 | 1 |
|  | ICP | F | post-op 2w | 0.018898 | 0.130862 | -0.237585861 | 0.275382 | 1 |
|  | ICP | F | post-op 6w | 0.17851 | 0.121104 | -0.058848168 | 0.415869 | 0.421419 |
|  | SVP | F | post-op 1d | 0.043091 | 0.174523 | -0.298967388 | 0.385149 | 1 |
|  | SVP | F | post-op 2w | 0.037395 | 0.191339 | -0.337622708 | 0.412413 | 1 |
|  | SVP | F | post-op 6w | -0.00262 | 0.165743 | -0.327468483 | 0.322234 | 1 |
|  | DCP | II | post-op 1d | -0.15077 | 0.081868 | -0.311230107 | 0.009688 | 0.196587 |
|  | DCP | II | post-op 2w | 0.047061 | 0.099396 | -0.147750159 | 0.241873 | 0.635873 |
|  | DCP | II | post-op 6w | -0.09008 | 0.077868 | -0.242697881 | 0.062537 | 0.494675 |
|  | ICP | II | post-op 1d | -0.13286 | 0.171233 | -0.468471791 | 0.202748 | 0.875599 |
|  | ICP | II | post-op 2w | -0.06404 | 0.170618 | -0.398448416 | 0.270361 | 0.875599 |
|  | ICP | II | post-op 6w | -0.27049 | 0.09641 | -0.459449052 | -0.08153 | 0.015066 |
|  | SVP | II | post-op 1d | -0.03227 | 0.083064 | -0.19507531 | 0.130531 | 1 |
|  | SVP | II | post-op 2w | -0.03682 | 0.15247 | -0.335654379 | 0.262017 | 1 |
|  | SVP | II | post-op 6w | -0.144 | 0.080482 | -0.301742158 | 0.013743 | 0.220743 |
|  | DCP | IN | post-op 1d | -0.20057 | 0.113465 | -0.422959523 | 0.021816 | 0.154225 |
|  | DCP | IN | post-op 2w | 0.069581 | 0.14335 | -0.211380406 | 0.350541 | 0.627401 |
|  | DCP | IN | post-op 6w | -0.15376 | 0.073052 | -0.296941731 | -0.01059 | 0.10591 |
|  | ICP | IN | post-op 1d | -0.1784 | 0.103894 | -0.382028059 | 0.025228 | 0.254433 |
|  | ICP | IN | post-op 2w | -0.00642 | 0.137147 | -0.275226537 | 0.262379 | 0.96264 |
|  | ICP | IN | post-op 6w | -0.20628 | 0.119689 | -0.440862361 | 0.028311 | 0.254433 |
|  | SVP | IN | post-op 1d | -0.20611 | 0.130945 | -0.462759113 | 0.050536 | 0.346441 |
|  | SVP | IN | post-op 2w | -0.0588 | 0.155611 | -0.363788788 | 0.246195 | 0.705547 |
|  | SVP | IN | post-op 6w | -0.16369 | 0.123409 | -0.40556813 | 0.078184 | 0.369399 |
|  | DCP | IS | post-op 1d | -0.1699 | 0.103875 | -0.373490872 | 0.03369 | 0.305752 |
|  | DCP | IS | post-op 2w | 0.002749 | 0.099107 | -0.191497281 | 0.196995 | 0.977872 |
|  | DCP | IS | post-op 6w | -0.09909 | 0.083144 | -0.262047246 | 0.063873 | 0.46672 |
|  | ICP | IS | post-op 1d | -0.10965 | 0.121483 | -0.347755075 | 0.128449 | 1 |
|  | ICP | IS | post-op 2w | 0.058031 | 0.132473 | -0.201610787 | 0.317673 | 1 |
|  | ICP | IS | post-op 6w | 0.041946 | 0.113317 | -0.180150962 | 0.264043 | 1 |
|  | SVP | IS | post-op 1d | -0.15534 | 0.114706 | -0.38015707 | 0.069481 | 0.351324 |
|  | SVP | IS | post-op 2w | -0.08207 | 0.136307 | -0.34922468 | 0.185088 | 0.547118 |
|  | SVP | IS | post-op 6w | -0.19174 | 0.105616 | -0.398742421 | 0.015265 | 0.208373 |
|  | DCP | ON | post-op 1d | -0.10358 | 0.117732 | -0.3343306 | 0.12717 | 0.757937 |
|  | DCP | ON | post-op 2w | 0.182637 | 0.12081 | -0.054146169 | 0.419419 | 0.391777 |
|  | DCP | ON | post-op 6w | -0.01785 | 0.094411 | -0.202895813 | 0.167189 | 0.850014 |
|  | ICP | ON | post-op 1d | -0.14114 | 0.128884 | -0.393746714 | 0.111468 | 0.820434 |
|  | ICP | ON | post-op 2w | -0.05029 | 0.164694 | -0.373082388 | 0.272505 | 0.820434 |
|  | ICP | ON | post-op 6w | -0.12507 | 0.144685 | -0.408647039 | 0.158508 | 0.820434 |
|  | SVP | ON | post-op 1d | -0.07118 | 0.101162 | -0.269449321 | 0.127099 | 1 |
|  | SVP | ON | post-op 2w | 0.01426 | 0.099683 | -0.181114071 | 0.209634 | 1 |
|  | SVP | ON | post-op 6w | 0.021849 | 0.100999 | -0.176105484 | 0.219804 | 1 |
|  | DCP | OS | post-op 1d | -0.16137 | 0.115738 | -0.38821163 | 0.065473 | 0.489713 |
|  | DCP | OS | post-op 2w | 0.11921 | 0.128822 | -0.133276187 | 0.371695 | 0.489713 |
|  | DCP | OS | post-op 6w | -0.11792 | 0.098589 | -0.311152815 | 0.075311 | 0.489713 |
|  | ICP | OS | post-op 1d | -0.55256 | 0.182079 | -0.909432001 | -0.1957 | 0.007222 |
|  | ICP | OS | post-op 2w | -0.12801 | 0.255054 | -0.627910485 | 0.371881 | 0.615728 |
|  | ICP | OS | post-op 6w | -0.39333 | 0.213334 | -0.811451766 | 0.024802 | 0.130452 |
|  | SVP | OS | post-op 1d | -0.21607 | 0.113298 | -0.438134897 | 0.005986 | 0.169512 |
|  | SVP | OS | post-op 2w | -0.2178 | 0.123393 | -0.459650613 | 0.024042 | 0.169512 |
|  | SVP | OS | post-op 6w | -0.08196 | 0.121748 | -0.320581169 | 0.156661 | 0.500823 |
|  | DCP | OT | post-op 1d | -0.22442 | 0.094059 | -0.408776889 | -0.04007 | 0.0511 |
|  | DCP | OT | post-op 2w | 0.000283 | 0.131791 | -0.258023362 | 0.258589 | 0.998287 |
|  | DCP | OT | post-op 6w | -0.08201 | 0.091386 | -0.261123255 | 0.097104 | 0.739017 |
|  | ICP | OT | post-op 1d | -0.18181 | 0.114887 | -0.406983822 | 0.043363 | 0.340594 |
|  | ICP | OT | post-op 2w | -0.00976 | 0.15987 | -0.323097005 | 0.30358 | 1 |
|  | ICP | OT | post-op 6w | -0.02734 | 0.136689 | -0.295246965 | 0.240562 | 1 |
|  | SVP | OT | post-op 1d | -0.11136 | 0.089676 | -0.287124791 | 0.0644 | 0.428603 |
|  | SVP | OT | post-op 2w | 0.04005 | 0.130312 | -0.215357327 | 0.295457 | 0.758587 |
|  | SVP | OT | post-op 6w | -0.13828 | 0.08772 | -0.310205509 | 0.033651 | 0.344836 |
|  | DCP | IT | post-op 1d | -0.12251 | 0.091906 | -0.302637828 | 0.057626 | 0.453198 |
|  | DCP | IT | post-op 2w | 0.050928 | 0.112134 | -0.168850651 | 0.270708 | 0.649703 |
|  | DCP | IT | post-op 6w | -0.11179 | 0.07786 | -0.264393822 | 0.040813 | 0.453198 |
|  | ICP | IT | post-op 1d | -0.34858 | 0.142823 | -0.628510552 | -0.06866 | 0.043981 |
|  | ICP | IT | post-op 2w | -0.1493 | 0.161387 | -0.465612171 | 0.167012 | 0.650462 |
|  | ICP | IT | post-op 6w | -0.12461 | 0.126663 | -0.372862904 | 0.123649 | 0.650462 |
|  | SVP | IT | post-op 1d | -0.32191 | 0.142245 | -0.600701084 | -0.04311 | 0.070898 |
|  | SVP | IT | post-op 2w | -0.17437 | 0.152731 | -0.473720252 | 0.124975 | 0.253581 |
|  | SVP | IT | post-op 6w | -0.22389 | 0.111896 | -0.443196426 | -0.00457 | 0.090819 |
|  | DCP | OI | post-op 1d | -0.10296 | 0.100616 | -0.30016792 | 0.094239 | 0.65402 |
|  | DCP | OI | post-op 2w | 0.147499 | 0.119738 | -0.087183547 | 0.382181 | 0.65402 |
|  | DCP | OI | post-op 6w | 0.026545 | 0.079825 | -0.129907818 | 0.182999 | 0.739477 |
|  | ICP | OI | post-op 1d | -0.45065 | 0.197298 | -0.837346527 | -0.06395 | 0.044731 |
|  | ICP | OI | post-op 2w | -0.47637 | 0.171778 | -0.813048387 | -0.13969 | 0.016654 |
|  | ICP | OI | post-op 6w | -0.20886 | 0.246754 | -0.692485988 | 0.274772 | 0.39732 |
|  | SVP | OI | post-op 1d | -0.18743 | 0.145684 | -0.472966345 | 0.098105 | 0.396497 |
|  | SVP | OI | post-op 2w | -0.3211 | 0.141088 | -0.597628267 | -0.04457 | 0.068557 |
|  | SVP | OI | post-op 6w | -0.11534 | 0.152948 | -0.415109261 | 0.184436 | 0.450795 |
|  | DCP | W | post-op 1d | -0.21908 | 0.081899 | -0.379598491 | -0.05856 | 0.022421 |
|  | DCP | W | post-op 2w | -0.00053 | 0.111123 | -0.218322056 | 0.217271 | 0.996228 |
|  | DCP | W | post-op 6w | -0.12243 | 0.078541 | -0.276366784 | 0.031507 | 0.238081 |
|  | ICP | W | post-op 1d | -0.2876 | 0.07977 | -0.443947247 | -0.13125 | 0.000935 |
|  | ICP | W | post-op 2w | -0.13494 | 0.11957 | -0.369288805 | 0.099415 | 0.270786 |
|  | ICP | W | post-op 6w | -0.15888 | 0.106407 | -0.367437372 | 0.04967 | 0.270786 |
|  | SVP | W | post-op 1d | -0.12772 | 0.086907 | -0.298055349 | 0.042615 | 0.424995 |
|  | SVP | W | post-op 2w | -0.11363 | 0.11011 | -0.329445433 | 0.102177 | 0.509307 |
|  | SVP | W | post-op 6w | -0.11574 | 0.101603 | -0.314876052 | 0.0834 | 0.509307 |

β represents the estimated marginal mean (EMM) difference versus baseline. P values are Holm-adjusted for multiple comparisons within each model. W=Whole; F=Foveal; S= Superior; T= Temporal; I= Inferior; N= Nasal; SVP=superficial vascular plexus; ICP= intermediate capillary plexus; DCP=deep capillary plexus.

Supplementary Table S4. Spearman correlations between surgical dose and postoperative changes (Δ) in VVD across ETDRS subfields.

| Layer | Region | Timepoint | Spearman r | CI_low | CI_high | p value |
| --- | --- | --- | --- | --- | --- | --- |
| SVP | F | post-op 1d | -0.1294 | -0.4316 | 0.1989 | 0.4261 |
| SVP | F | post-op 2w | -0.2319 | -0.5139 | 0.09521 | 0.1498 |
| SVP | F | post-op 6w | -0.07325 | -0.3843 | 0.2528 | 0.6533 |
| SVP | II | post-op 1d | -0.2842 | -0.5539 | 0.03944 | 0.0755 |
| SVP | II | post-op 2w | -0.1635 | -0.4595 | 0.1652 | 0.3134 |
| SVP | II | post-op 6w | -0.1827 | -0.475 | 0.146 | 0.2593 |
| SVP | IN | post-op 1d | -0.2095 | -0.4963 | 0.1186 | 0.1945 |
| SVP | IN | post-op 2w | -0.3571 | -0.6077 | -0.04181 | 0.0237 |
| SVP | IN | post-op 6w | -0.3015 | -0.5669 | 0.02056 | 0.0587 |
| SVP | IS | post-op 1d | -0.3042 | -0.5689 | 0.01765 | 0.0564 |
| SVP | IS | post-op 2w | -0.3199 | -0.5806 | 0.000184 | 0.0442 |
| SVP | IS | post-op 6w | -0.2615 | -0.5367 | 0.06395 | 0.1031 |
| SVP | IT | post-op 1d | -0.1253 | -0.4282 | 0.203 | 0.4412 |
| SVP | IT | post-op 2w | 0.004437 | -0.3161 | 0.3241 | 0.9783 |
| SVP | IT | post-op 6w | -0.0876 | -0.3966 | 0.2392 | 0.5909 |
| SVP | OI | post-op 1d | -0.1982 | -0.4874 | 0.1301 | 0.2201 |
| SVP | OI | post-op 2w | -0.1418 | -0.4418 | 0.1868 | 0.3828 |
| SVP | OI | post-op 6w | -0.1569 | -0.4542 | 0.1718 | 0.3336 |
| SVP | ON | post-op 1d | -0.2773 | -0.5487 | 0.0469 | 0.0832 |
| SVP | ON | post-op 2w | -0.205 | -0.4928 | 0.1231 | 0.2044 |
| SVP | ON | post-op 6w | -0.3174 | -0.5787 | 0.003021 | 0.046 |
| SVP | OS | post-op 1d | -0.2431 | -0.5225 | 0.0835 | 0.1307 |
| SVP | OS | post-op 2w | -0.3531 | -0.6048 | -0.03717 | 0.0254 |
| SVP | OS | post-op 6w | -0.1951 | -0.4849 | 0.1333 | 0.2276 |
| SVP | OT | post-op 1d | -0.09251 | -0.4007 | 0.2345 | 0.5702 |
| SVP | OT | post-op 2w | -0.02549 | -0.3428 | 0.297 | 0.8759 |
| SVP | OT | post-op 6w | -0.05683 | -0.3702 | 0.2681 | 0.7276 |
| ICP | F | post-op 1d | -0.1505 | -0.449 | 0.1781 | 0.3539 |
| ICP | F | post-op 2w | -0.2268 | -0.5099 | 0.1006 | 0.1593 |
| ICP | F | post-op 6w | -0.07722 | -0.3877 | 0.249 | 0.6358 |
| ICP | II | post-op 1d | -0.03172 | -0.3483 | 0.2913 | 0.8459 |
| ICP | II | post-op 2w | 0.1513 | -0.1774 | 0.4496 | 0.3513 |
| ICP | II | post-op 6w | 0.09053 | -0.2364 | 0.3991 | 0.5785 |
| ICP | IN | post-op 1d | -0.2372 | -0.518 | 0.08967 | 0.1405 |
| ICP | IN | post-op 2w | -0.00859 | -0.3278 | 0.3124 | 0.958 |
| ICP | IN | post-op 6w | -0.1208 | -0.4245 | 0.2073 | 0.4576 |
| ICP | IS | post-op 1d | -0.1671 | -0.4624 | 0.1616 | 0.3028 |
| ICP | IS | post-op 2w | 0.04626 | -0.2779 | 0.361 | 0.7769 |
| ICP | IS | post-op 6w | -0.01595 | -0.3343 | 0.3057 | 0.9222 |
| ICP | IT | post-op 1d | 0.1136 | -0.2143 | 0.4184 | 0.4854 |
| ICP | IT | post-op 2w | 0.2491 | -0.07711 | 0.5272 | 0.1211 |
| ICP | IT | post-op 6w | 0.1547 | -0.174 | 0.4524 | 0.3405 |
| ICP | OI | post-op 1d | -0.2311 | -0.5132 | 0.0961 | 0.1514 |
| ICP | OI | post-op 2w | -0.2291 | -0.5117 | 0.09818 | 0.155 |
| ICP | OI | post-op 6w | -0.22 | -0.5045 | 0.1077 | 0.1726 |
| ICP | ON | post-op 1d | -0.3468 | -0.6003 | -0.03008 | 0.0283 |
| ICP | ON | post-op 2w | -0.2307 | -0.5129 | 0.0965 | 0.1521 |
| ICP | ON | post-op 6w | -0.2633 | -0.538 | 0.06203 | 0.1007 |
| ICP | OS | post-op 1d | -0.2878 | -0.5566 | 0.03554 | 0.0717 |
| ICP | OS | post-op 2w | -0.2668 | -0.5407 | 0.05829 | 0.0961 |
| ICP | OS | post-op 6w | -0.3248 | -0.5842 | -0.00529 | 0.0408 |
| ICP | OT | post-op 1d | 0.04805 | -0.2763 | 0.3626 | 0.7684 |
| ICP | OT | post-op 2w | 0.01803 | -0.3038 | 0.3362 | 0.9121 |
| ICP | OT | post-op 6w | -0.00953 | -0.3286 | 0.3115 | 0.9534 |
| DCP | F | post-op 1d | -0.07944 | -0.3896 | 0.2469 | 0.6261 |
| DCP | F | post-op 2w | -0.1189 | -0.4229 | 0.2091 | 0.4648 |
| DCP | F | post-op 6w | -0.01605 | -0.3344 | 0.3056 | 0.9217 |
| DCP | II | post-op 1d | -0.1524 | -0.4505 | 0.1763 | 0.348 |
| DCP | II | post-op 2w | -0.03474 | -0.3509 | 0.2886 | 0.8315 |
| DCP | II | post-op 6w | -0.06495 | -0.3772 | 0.2606 | 0.6905 |
| DCP | IN | post-op 1d | -0.2271 | -0.5101 | 0.1002 | 0.1587 |
| DCP | IN | post-op 2w | -0.4823 | -0.6951 | -0.1918 | 0.0016 |
| DCP | IN | post-op 6w | -0.3667 | -0.6147 | -0.05286 | 0.0199 |
| DCP | IS | post-op 1d | -0.1603 | -0.4569 | 0.1684 | 0.3231 |
| DCP | IS | post-op 2w | -0.2148 | -0.5004 | 0.1131 | 0.1833 |
| DCP | IS | post-op 6w | -0.1559 | -0.4534 | 0.1728 | 0.3366 |
| DCP | IT | post-op 1d | 0.0674 | -0.2583 | 0.3793 | 0.6794 |
| DCP | IT | post-op 2w | -0.02719 | -0.3443 | 0.2955 | 0.8677 |
| DCP | IT | post-op 6w | 0.1263 | -0.2019 | 0.429 | 0.4374 |
| DCP | OI | post-op 1d | 0.03304 | -0.2901 | 0.3494 | 0.8396 |
| DCP | OI | post-op 2w | 0.1856 | -0.143 | 0.4773 | 0.2516 |
| DCP | OI | post-op 6w | 0.01841 | -0.3035 | 0.3365 | 0.9102 |
| DCP | ON | post-op 1d | -0.1441 | -0.4437 | 0.1845 | 0.3752 |
| DCP | ON | post-op 2w | 0.09638 | -0.2308 | 0.404 | 0.5541 |
| DCP | ON | post-op 6w | -0.1173 | -0.4216 | 0.2107 | 0.4709 |
| DCP | OS | post-op 1d | 0.06976 | -0.256 | 0.3813 | 0.6688 |
| DCP | OS | post-op 2w | 0.3118 | -0.0092 | 0.5745 | 0.0502 |
| DCP | OS | post-op 6w | 0.05381 | -0.2709 | 0.3676 | 0.7416 |
| DCP | OT | post-op 1d | 0.1778 | -0.1508 | 0.4711 | 0.2722 |
| DCP | OT | post-op 2w | 0.3836 | 0.07245 | 0.6268 | 0.0145 |
| DCP | OT | post-op 6w | 0.2111 | -0.1169 | 0.4975 | 0.1911 |

Δ denotes postoperative change relative to baseline. F=Foveal; S= Superior; T= Temporal; I= Inferior; N= Nasal; SVP=superficial vascular plexus; ICP= intermediate capillary plexus; DCP=deep capillary plexus.

Supplementary Table S5. Spearman correlations between surgical dose and postoperative changes (Δ) in VSD across ETDRS

subfields.

| **Layer** | **Region** | **Timepoint** | **Spearman r** | **CI_low** | **CI_high** | **p value** |
| --- | --- | --- | --- | --- | --- | --- |
| SVP | F | post-op 1d | -0.1679 | -0.4667 | 0.1653 | 0.3068 |
| SVP | F | post-op 2w | -0.3128 | -0.5784 | 0.01264 | 0.0525 |
| SVP | F | post-op 6w | -0.1104 | -0.4195 | 0.2218 | 0.5036 |
| SVP | II | post-op 1d | -0.2672 | -0.5442 | 0.06242 | 0.1001 |
| SVP | II | post-op 2w | -0.2353 | -0.5198 | 0.09625 | 0.1493 |
| SVP | II | post-op 6w | -0.2027 | -0.4944 | 0.1301 | 0.2159 |
| SVP | IN | post-op 1d | -0.2225 | -0.5099 | 0.1095 | 0.1733 |
| SVP | IN | post-op 2w | -0.3832 | -0.6292 | -0.06743 | 0.016 |
| SVP | IN | post-op 6w | -0.3198 | -0.5835 | 0.004944 | 0.0472 |
| SVP | IS | post-op 1d | -0.2799 | -0.5538 | 0.04869 | 0.0844 |
| SVP | IS | post-op 2w | -0.3686 | -0.6188 | -0.0504 | 0.021 |
| SVP | IS | post-op 6w | -0.2676 | -0.5445 | 0.06198 | 0.0996 |
| SVP | IT | post-op 1d | -0.1181 | -0.426 | 0.2143 | 0.474 |
| SVP | IT | post-op 2w | -0.1513 | -0.4533 | 0.1818 | 0.3578 |
| SVP | IT | post-op 6w | -0.1082 | -0.4177 | 0.2238 | 0.512 |
| SVP | OI | post-op 1d | -0.2082 | -0.4987 | 0.1244 | 0.2035 |
| SVP | OI | post-op 2w | -0.2522 | -0.5328 | 0.0784 | 0.1214 |
| SVP | OI | post-op 6w | -0.189 | -0.4836 | 0.144 | 0.2491 |
| SVP | ON | post-op 1d | -0.3045 | -0.5722 | 0.02188 | 0.0595 |
| SVP | ON | post-op 2w | -0.3716 | -0.621 | -0.05393 | 0.0198 |
| SVP | ON | post-op 6w | -0.2749 | -0.5501 | 0.05409 | 0.0903 |
| SVP | OS | post-op 1d | -0.24 | -0.5234 | 0.09132 | 0.1412 |
| SVP | OS | post-op 2w | -0.2863 | -0.5587 | 0.04173 | 0.0772 |
| SVP | OS | post-op 6w | -0.1599 | -0.4602 | 0.1733 | 0.3309 |
| SVP | OT | post-op 1d | -0.03923 | -0.3589 | 0.2886 | 0.8126 |
| SVP | OT | post-op 2w | -0.02588 | -0.3472 | 0.3008 | 0.8757 |
| SVP | OT | post-op 6w | -0.04494 | -0.3638 | 0.2834 | 0.7859 |
| ICP | F | post-op 1d | -0.1736 | -0.4713 | 0.1596 | 0.2906 |
| ICP | F | post-op 2w | -0.3002 | -0.569 | 0.02657 | 0.0633 |
| ICP | F | post-op 6w | -0.1494 | -0.4517 | 0.1837 | 0.364 |
| ICP | II | post-op 1d | -0.09431 | -0.4061 | 0.2371 | 0.5679 |
| ICP | II | post-op 2w | 0.008152 | -0.3169 | 0.3315 | 0.9607 |
| ICP | II | post-op 6w | -0.02109 | -0.3429 | 0.3052 | 0.8986 |
| ICP | IN | post-op 1d | -0.1748 | -0.4722 | 0.1583 | 0.2871 |
| ICP | IN | post-op 2w | -0.1349 | -0.4398 | 0.198 | 0.413 |
| ICP | IN | post-op 6w | -0.1406 | -0.4445 | 0.1923 | 0.3932 |
| ICP | IS | post-op 1d | -0.2645 | -0.5422 | 0.06532 | 0.1037 |
| ICP | IS | post-op 2w | -0.119 | -0.4267 | 0.2134 | 0.4707 |
| ICP | IS | post-op 6w | -0.1259 | -0.4324 | 0.2067 | 0.445 |
| ICP | IT | post-op 1d | -0.01177 | -0.3347 | 0.3136 | 0.9433 |
| ICP | IT | post-op 2w | 0.04239 | -0.2857 | 0.3616 | 0.7978 |
| ICP | IT | post-op 6w | -0.03852 | -0.3582 | 0.2893 | 0.8159 |
| ICP | OI | post-op 1d | -0.2073 | -0.498 | 0.1253 | 0.2055 |
| ICP | OI | post-op 2w | -0.2541 | -0.5343 | 0.07634 | 0.1185 |
| ICP | OI | post-op 6w | -0.1967 | -0.4896 | 0.1362 | 0.2302 |
| ICP | ON | post-op 1d | -0.3454 | -0.6022 | -0.02393 | 0.0313 |
| ICP | ON | post-op 2w | -0.3684 | -0.6187 | -0.05016 | 0.021 |
| ICP | ON | post-op 6w | -0.2269 | -0.5133 | 0.105 | 0.1648 |
| ICP | OS | post-op 1d | -0.2744 | -0.5497 | 0.05464 | 0.0909 |
| ICP | OS | post-op 2w | -0.3142 | -0.5793 | 0.01117 | 0.0515 |
| ICP | OS | post-op 6w | -0.2737 | -0.5492 | 0.05541 | 0.0918 |
| ICP | OT | post-op 1d | -0.05951 | -0.3764 | 0.2699 | 0.719 |
| ICP | OT | post-op 2w | 0.002038 | -0.3224 | 0.326 | 0.9902 |
| ICP | OT | post-op 6w | -0.08936 | -0.4019 | 0.2418 | 0.5885 |
| DCP | F | post-op 1d | -0.1494 | -0.4517 | 0.1837 | 0.364 |
| DCP | F | post-op 2w | -0.179 | -0.4756 | 0.1541 | 0.2755 |
| DCP | F | post-op 6w | 0.03913 | -0.2887 | 0.3588 | 0.813 |
| DCP | II | post-op 1d | -0.1082 | -0.4177 | 0.2238 | 0.512 |
| DCP | II | post-op 2w | -0.1587 | -0.4592 | 0.1745 | 0.3347 |
| DCP | II | post-op 6w | -0.1071 | -0.4168 | 0.2249 | 0.5164 |
| DCP | IN | post-op 1d | -0.125 | -0.4317 | 0.2076 | 0.4482 |
| DCP | IN | post-op 2w | -0.5125 | -0.7175 | -0.2259 | 0.0008 |
| DCP | IN | post-op 6w | -0.2759 | -0.5508 | 0.05299 | 0.0891 |
| DCP | IS | post-op 1d | -0.1424 | -0.446 | 0.1906 | 0.3873 |
| DCP | IS | post-op 2w | -0.3629 | -0.6147 | -0.04383 | 0.0232 |
| DCP | IS | post-op 6w | -0.1055 | -0.4154 | 0.2265 | 0.5228 |
| DCP | IT | post-op 1d | -0.02272 | -0.3444 | 0.3037 | 0.8908 |
| DCP | IT | post-op 2w | -0.1085 | -0.418 | 0.2235 | 0.5108 |
| DCP | IT | post-op 6w | 0.06766 | -0.2623 | 0.3834 | 0.6823 |
| DCP | OI | post-op 1d | 0.05431 | -0.2747 | 0.3719 | 0.7426 |
| DCP | OI | post-op 2w | 0.122 | -0.2105 | 0.4292 | 0.4595 |
| DCP | OI | post-op 6w | 0.02476 | -0.3018 | 0.3462 | 0.8811 |
| DCP | ON | post-op 1d | -0.06267 | -0.3792 | 0.2669 | 0.7047 |
| DCP | ON | post-op 2w | -0.06715 | -0.383 | 0.2628 | 0.6846 |
| DCP | ON | post-op 6w | -0.1143 | -0.4228 | 0.2179 | 0.4883 |
| DCP | OS | post-op 1d | 0.007846 | -0.3171 | 0.3312 | 0.9622 |
| DCP | OS | post-op 2w | 0.2269 | -0.105 | 0.5133 | 0.1648 |
| DCP | OS | post-op 6w | 0.001834 | -0.3225 | 0.3258 | 0.9912 |
| DCP | OT | post-op 1d | 0.09517 | -0.2363 | 0.4068 | 0.5644 |
| DCP | OT | post-op 2w | 0.2426 | -0.08853 | 0.5255 | 0.1367 |
| DCP | OT | post-op 6w | 0.1097 | -0.2224 | 0.419 | 0.506 |

Δ denotes postoperative change relative to baseline. F=Foveal; S= Superior; T= Temporal; I= Inferior; N= Nasal; SVP=superficial vascular plexus; ICP= intermediate capillary plexus; DCP=deep capillary plexus.

Supplementary Table S6. Spearman correlations between surgical dose and postoperative changes (Δ) in VDI across ETDRS

subfields.

| **Layer** | **Region** | **Timepoint** | **Spearman r** | **CI_low** | **CI_high** | **p value** |
| --- | --- | --- | --- | --- | --- | --- |
| SVP | F | post-op 1d | -0.02728 | -0.3444 | 0.2954 | 0.8673 |
| SVP | F | post-op 2w | 0.1721 | -0.1566 | 0.4665 | 0.2883 |
| SVP | F | post-op 6w | 0.1799 | -0.1487 | 0.4728 | 0.2666 |
| SVP | II | post-op 1d | 0.04069 | -0.2831 | 0.3561 | 0.8032 |
| SVP | II | post-op 2w | 0.2881 | -0.03523 | 0.5568 | 0.0714 |
| SVP | II | post-op 6w | 0.1872 | -0.1414 | 0.4786 | 0.2474 |
| SVP | IN | post-op 1d | 0.2788 | -0.04537 | 0.5498 | 0.0815 |
| SVP | IN | post-op 2w | 0.4041 | 0.09652 | 0.6413 | 0.0097 |
| SVP | IN | post-op 6w | 0.1773 | -0.1514 | 0.4707 | 0.2738 |
| SVP | IS | post-op 1d | 0.2029 | -0.1254 | 0.4911 | 0.2093 |
| SVP | IS | post-op 2w | 0.3138 | -0.007005 | 0.576 | 0.0486 |
| SVP | IS | post-op 6w | 0.1811 | -0.1476 | 0.4737 | 0.2635 |
| SVP | IT | post-op 1d | 0.1712 | -0.1575 | 0.4658 | 0.2907 |
| SVP | IT | post-op 2w | 0.3905 | 0.08051 | 0.6317 | 0.0127 |
| SVP | IT | post-op 6w | 0.06967 | -0.2561 | 0.3813 | 0.6693 |
| SVP | OI | post-op 1d | 0.2445 | -0.08201 | 0.5236 | 0.1284 |
| SVP | OI | post-op 2w | 0.3144 | -0.006272 | 0.5765 | 0.0481 |
| SVP | OI | post-op 6w | 0.1646 | -0.1641 | 0.4605 | 0.31 |
| SVP | ON | post-op 1d | 0.322 | 0.002131 | 0.5821 | 0.0427 |
| SVP | ON | post-op 2w | 0.275 | -0.04945 | 0.5469 | 0.0859 |
| SVP | ON | post-op 6w | 0.1074 | -0.2202 | 0.4133 | 0.5094 |
| SVP | OS | post-op 1d | 0.08071 | -0.2457 | 0.3907 | 0.6205 |
| SVP | OS | post-op 2w | -0.006136 | -0.3256 | 0.3146 | 0.97 |
| SVP | OS | post-op 6w | 0.1377 | -0.1908 | 0.4385 | 0.3967 |
| SVP | OT | post-op 1d | 0.07429 | -0.2518 | 0.3852 | 0.6487 |
| SVP | OT | post-op 2w | 0.2827 | -0.04108 | 0.5528 | 0.0771 |
| SVP | OT | post-op 6w | 0.06268 | -0.2627 | 0.3752 | 0.7008 |
| ICP | F | post-op 1d | -0.1424 | -0.4538 | 0.1999 | 0.4004 |
| ICP | F | post-op 2w | -0.0976 | -0.4257 | 0.2532 | 0.577 |
| ICP | F | post-op 6w | 0.1037 | -0.2527 | 0.4354 | 0.5594 |
| ICP | II | post-op 1d | 0.02832 | -0.2944 | 0.3453 | 0.8623 |
| ICP | II | post-op 2w | 0.2897 | -0.03348 | 0.558 | 0.0698 |
| ICP | II | post-op 6w | 0.2408 | -0.08589 | 0.5208 | 0.1344 |
| ICP | IN | post-op 1d | -0.02624 | -0.3434 | 0.2963 | 0.8723 |
| ICP | IN | post-op 2w | 0.1656 | -0.1632 | 0.4612 | 0.3072 |
| ICP | IN | post-op 6w | 0.01605 | -0.3056 | 0.3344 | 0.9217 |
| ICP | IS | post-op 1d | 0.1063 | -0.2213 | 0.4123 | 0.5139 |
| ICP | IS | post-op 2w | 0.1285 | -0.1998 | 0.4308 | 0.4295 |
| ICP | IS | post-op 6w | -0.1033 | -0.4098 | 0.2242 | 0.526 |
| ICP | IT | post-op 1d | 0.1349 | -0.1935 | 0.4361 | 0.4066 |
| ICP | IT | post-op 2w | 0.255 | -0.0709 | 0.5317 | 0.1123 |
| ICP | IT | post-op 6w | 0.05013 | -0.2744 | 0.3644 | 0.7587 |
| ICP | OI | post-op 1d | 0.1277 | -0.2006 | 0.4302 | 0.4322 |
| ICP | OI | post-op 2w | 0.1766 | -0.1521 | 0.4701 | 0.2756 |
| ICP | OI | post-op 6w | 0.1002 | -0.2272 | 0.4072 | 0.5386 |
| ICP | ON | post-op 1d | 0.1116 | -0.2162 | 0.4168 | 0.4931 |
| ICP | ON | post-op 2w | 0.1961 | -0.1323 | 0.4857 | 0.2253 |
| ICP | ON | post-op 6w | 0.02284 | -0.2994 | 0.3404 | 0.8887 |
| ICP | OS | post-op 1d | -0.1041 | -0.4105 | 0.2234 | 0.5226 |
| ICP | OS | post-op 2w | 0.1354 | -0.1931 | 0.4365 | 0.4049 |
| ICP | OS | post-op 6w | 0.0303 | -0.2926 | 0.347 | 0.8527 |
| ICP | OT | post-op 1d | 0.2608 | -0.06466 | 0.5361 | 0.104 |
| ICP | OT | post-op 2w | 0.2166 | -0.1111 | 0.5019 | 0.1794 |
| ICP | OT | post-op 6w | 0.1802 | -0.1484 | 0.473 | 0.2658 |
| DCP | F | post-op 1d | -0.1914 | -0.4929 | 0.1511 | 0.2565 |
| DCP | F | post-op 2w | -0.2609 | -0.5618 | 0.101 | 0.1425 |
| DCP | F | post-op 6w | -0.3625 | -0.6305 | -0.01735 | 0.0351 |
| DCP | II | post-op 1d | -0.02889 | -0.3458 | 0.2939 | 0.8596 |
| DCP | II | post-op 2w | 0.3128 | -0.008052 | 0.5753 | 0.0494 |
| DCP | II | post-op 6w | 0.1056 | -0.222 | 0.4118 | 0.5165 |
| DCP | IN | post-op 1d | 0.1068 | -0.2209 | 0.4127 | 0.512 |
| DCP | IN | post-op 2w | 0.2541 | -0.0718 | 0.531 | 0.1136 |
| DCP | IN | post-op 6w | 0.1238 | -0.2044 | 0.4269 | 0.4468 |
| DCP | IS | post-op 1d | -0.02785 | -0.3449 | 0.2949 | 0.8646 |
| DCP | IS | post-op 2w | 0.15 | -0.1787 | 0.4485 | 0.3556 |
| DCP | IS | post-op 6w | -0.02823 | -0.3452 | 0.2945 | 0.8627 |
| DCP | IT | post-op 1d | 0.05617 | -0.2687 | 0.3696 | 0.7307 |
| DCP | IT | post-op 2w | 0.2608 | -0.06466 | 0.5361 | 0.104 |
| DCP | IT | post-op 6w | 0.07845 | -0.2479 | 0.3888 | 0.6304 |
| DCP | OI | post-op 1d | -0.04852 | -0.363 | 0.2758 | 0.7662 |
| DCP | OI | post-op 2w | 0.1916 | -0.1368 | 0.4821 | 0.2362 |
| DCP | OI | post-op 6w | -0.06702 | -0.379 | 0.2586 | 0.6811 |
| DCP | ON | post-op 1d | -0.064 | -0.3764 | 0.2614 | 0.6948 |
| DCP | ON | post-op 2w | 0.1492 | -0.1794 | 0.4479 | 0.358 |
| DCP | ON | post-op 6w | -0.06183 | -0.3745 | 0.2635 | 0.7047 |
| DCP | OS | post-op 1d | -0.04314 | -0.3583 | 0.2808 | 0.7915 |
| DCP | OS | post-op 2w | 0.2353 | -0.09165 | 0.5165 | 0.1438 |
| DCP | OS | post-op 6w | 0.09194 | -0.2351 | 0.4003 | 0.5726 |
| DCP | OT | post-op 1d | 0.2581 | -0.06758 | 0.5341 | 0.1079 |
| DCP | OT | post-op 2w | 0.3469 | 0.03018 | 0.6003 | 0.0283 |
| DCP | OT | post-op 6w | 0.1057 | -0.2219 | 0.4119 | 0.5161 |

Δ denotes postoperative change relative to baseline. F=Foveal; S= Superior; T= Temporal; I= Inferior; N= Nasal; SVP=superficial vascular plexus; ICP= intermediate capillary plexus; DCP=deep capillary plexus.
