# Supplementary material
Source: Research Square preprint supplement (doi:10.21203/rs.3.rs-9039006/v1)
Supplement: Supplementary file 2 [file 5f6ca83723ab8052d3c84064.docx]

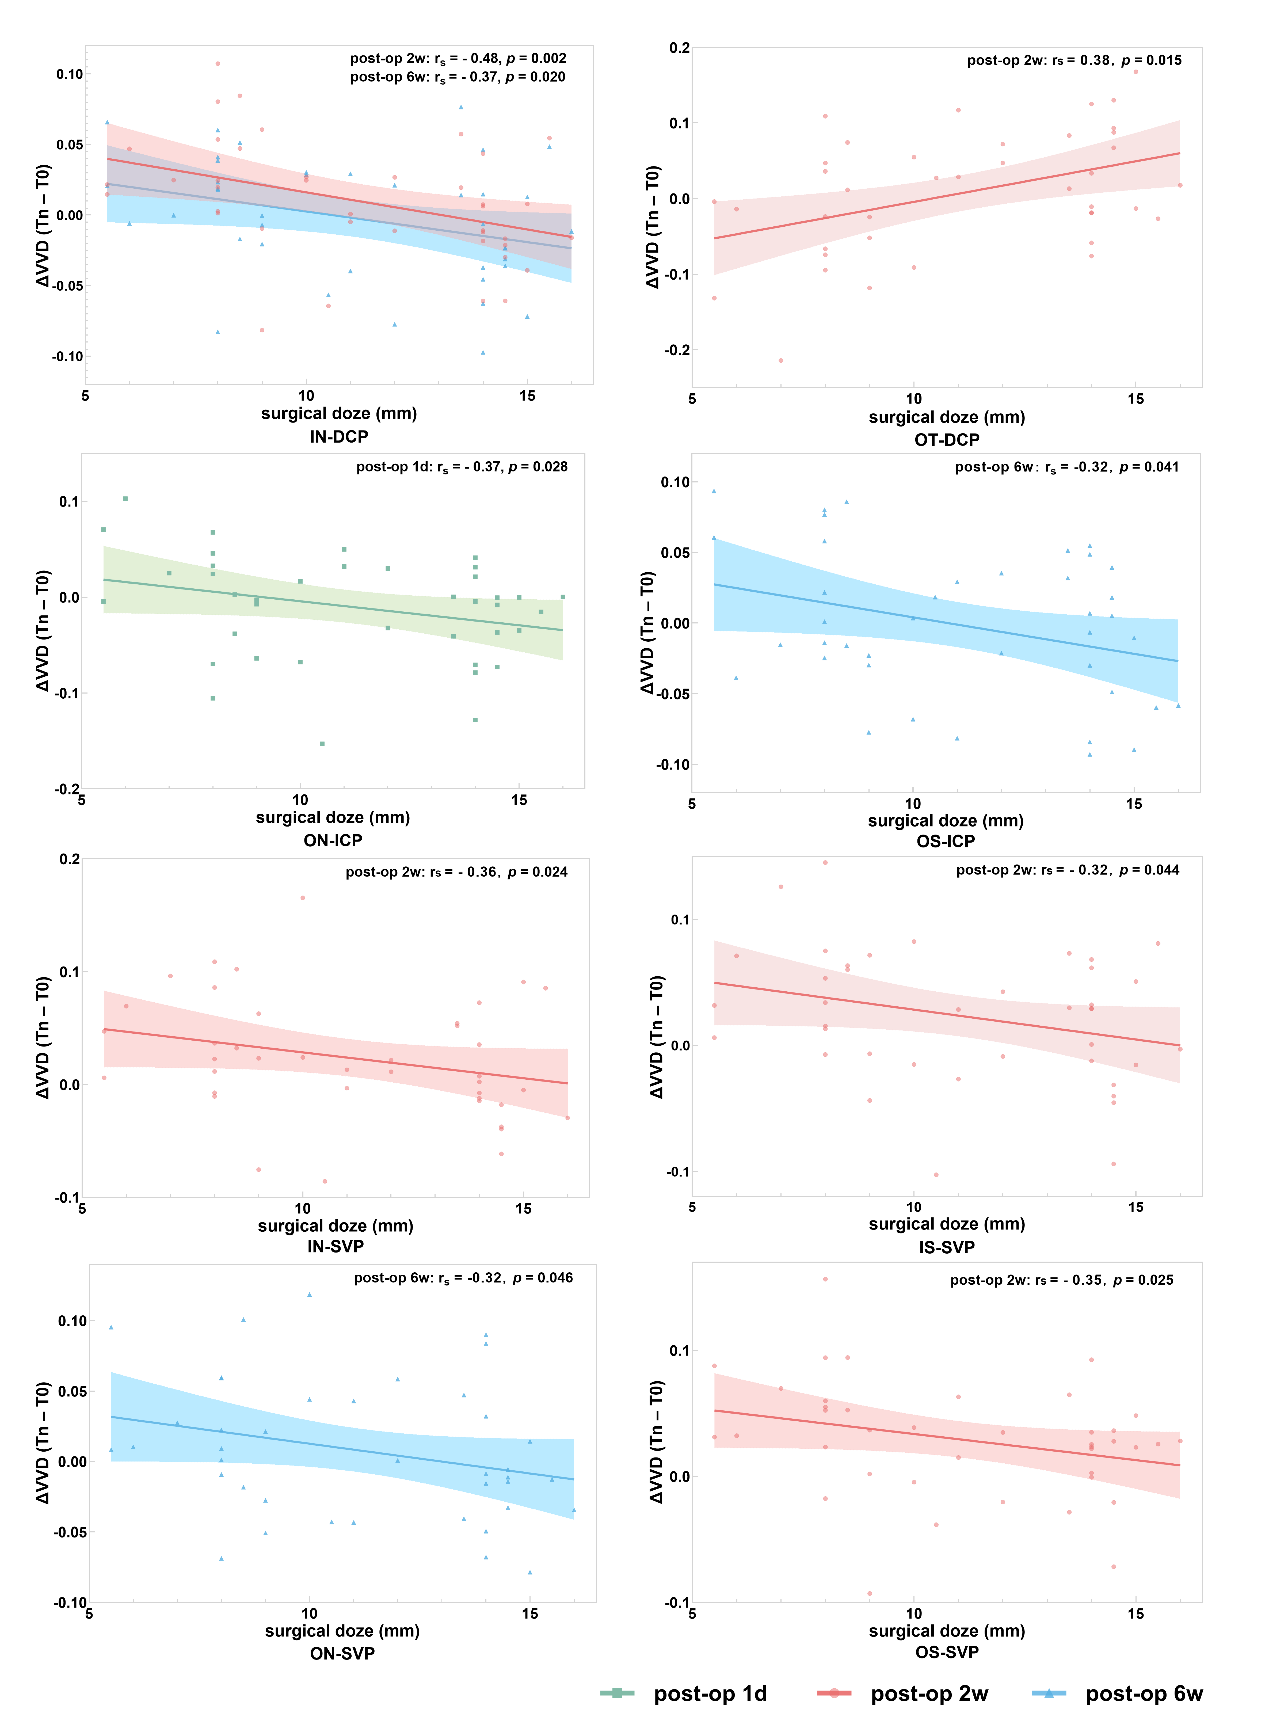


Supplementary Figure 1.Scatterplots of dose–response associations between surgical dose and postoperative changes in vessel volume density (ΔVVD) in selected macular subfields and plexuses. Δ values were calculated as follow-up minus baseline. Colors indicate timepoints (post-op 1d, post-op 2w, post-op 6w). Spearman rs and two-tailed P values are annotated for each timepoint. The fitted line and shaded band represent a least-squares trend with 95% confidence interval for visualization only.


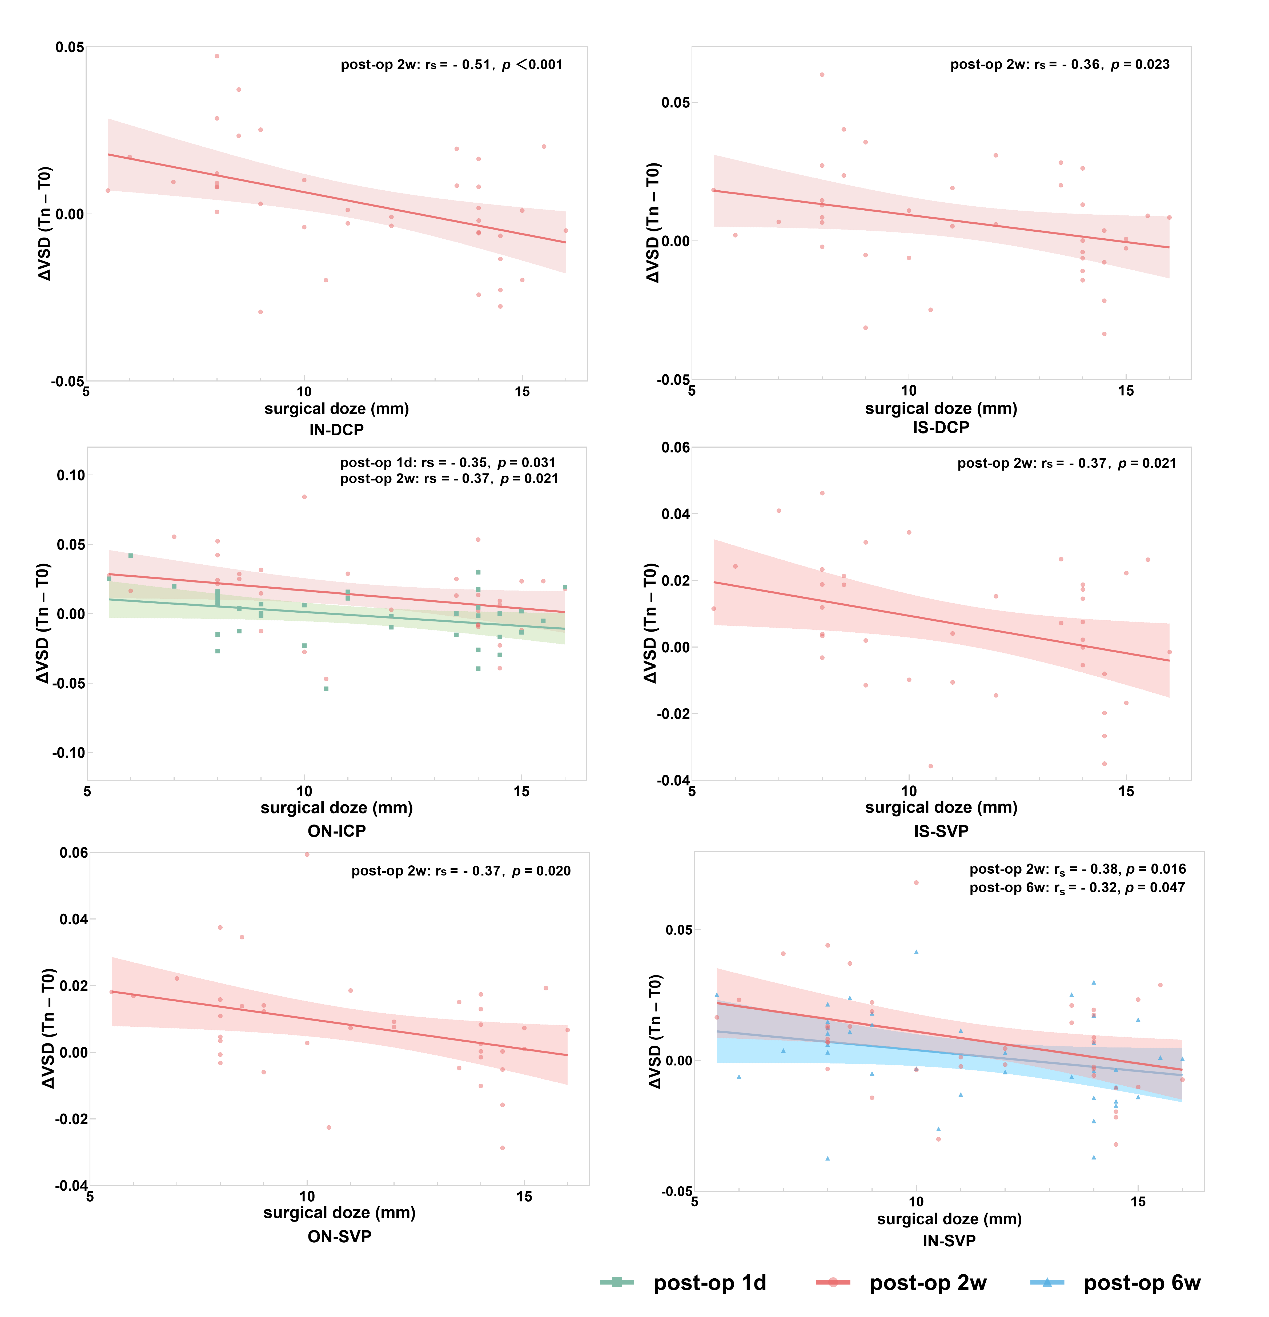


Supplementary Figure 2. Scatterplots of dose–response associations between surgical dose and postoperative changes in vessel skeleton density (ΔVSD) in selected macular subfields and plexuses. Δ values were calculated as follow-up minus baseline. Colors indicate timepoints (post-op 1d, post-op 2w, post-op 6w). Spearman rs and two-tailed P values are annotated for each timepoint. The fitted line and shaded band represent a least-squares trend with 95% confidence interval for visualization only.


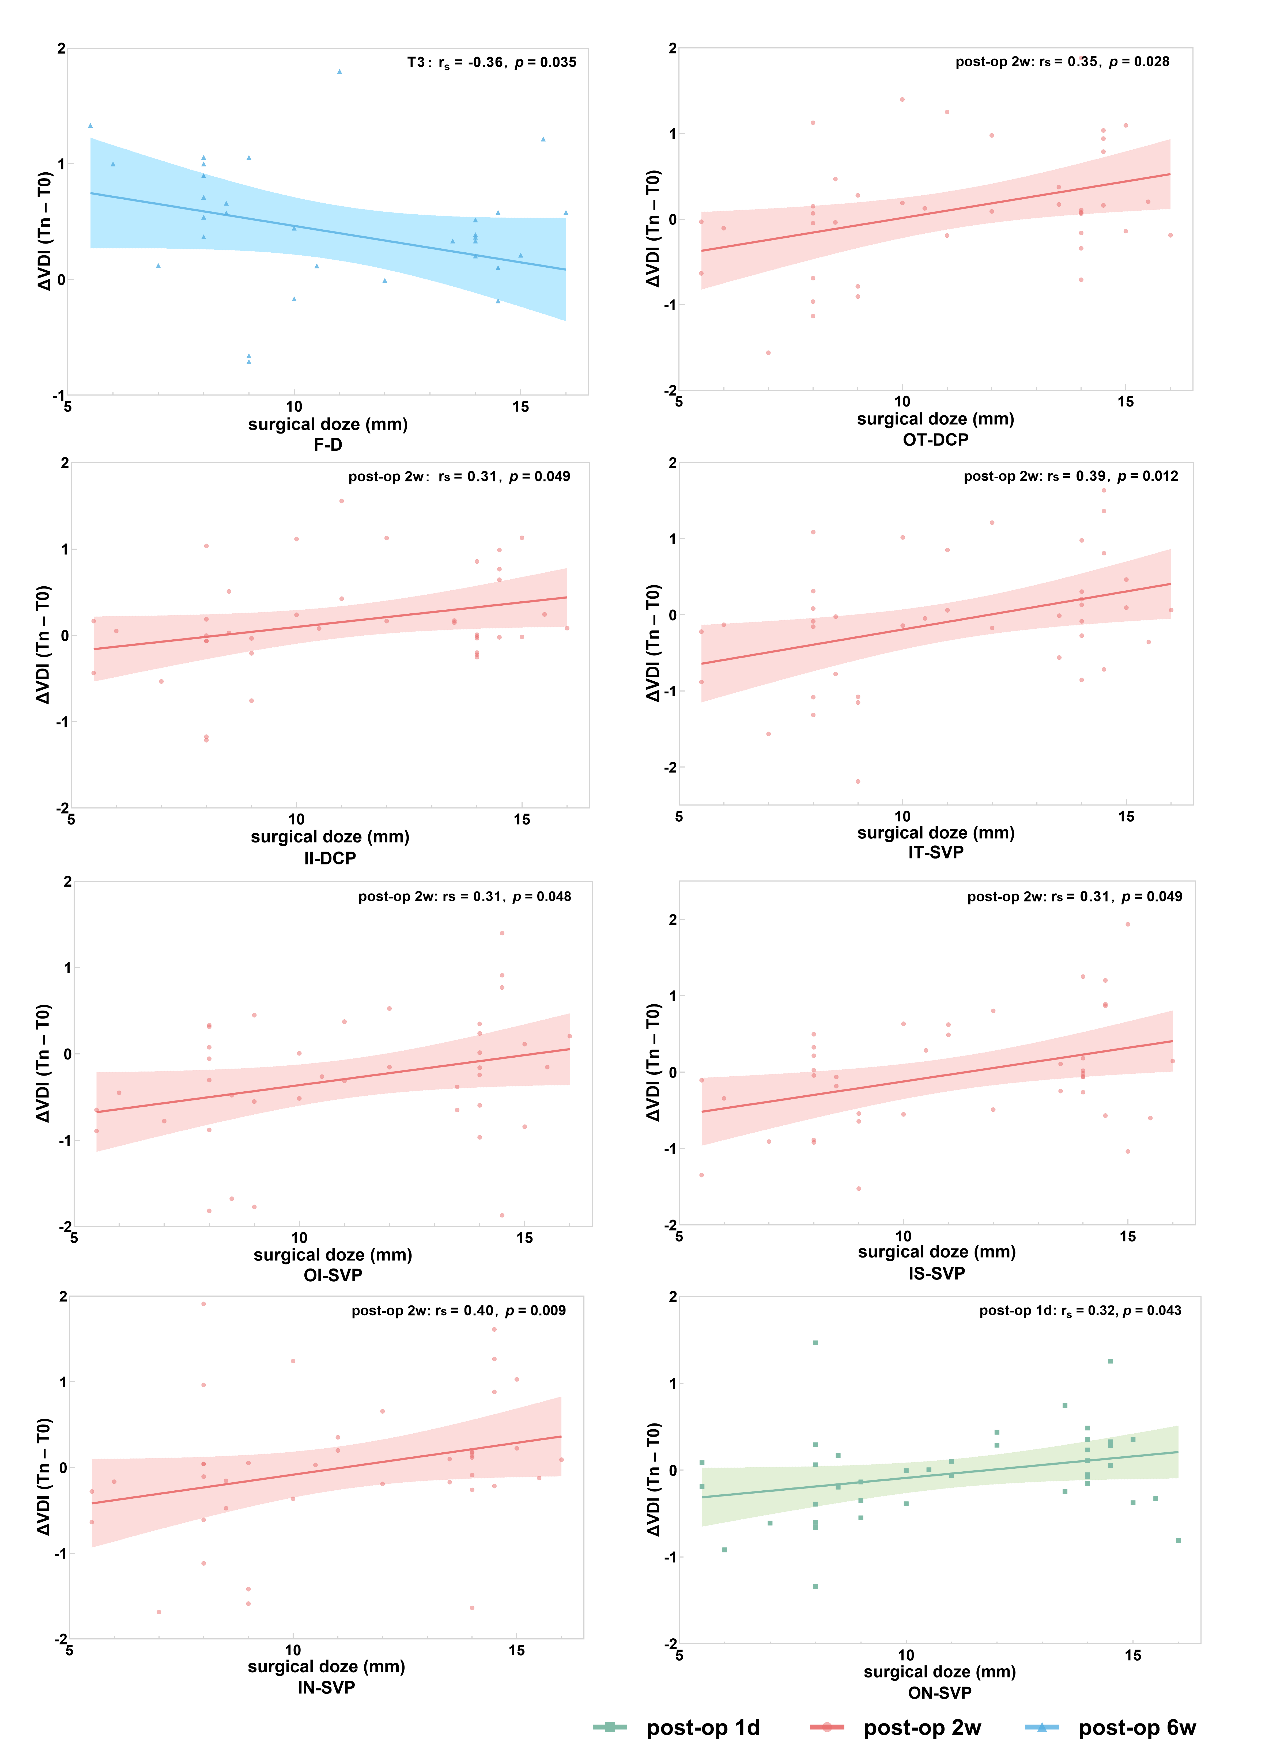


Supplementary Figure 3. Scatterplots of dose–response associations between surgical dose and postoperative changes in vessel diameter index (ΔVDI) in selected macular subfields/plexuses. Δ values were calculated as follow-up minus baseline. Colors indicate timepoints (post-op 1d, post-op 2w, post-op 6w). Spearman rs and two-tailed P values are annotated for each timepoint. The fitted line and shaded band represent a least-squares trend with 95% confidence interval for visualization only.
